# Supplementary material for: Nickel-catalyzed highly regioselective hydrocyanation of alkenes with Zn(CN)2
Source: Royal Society of Chemistry journal article supplement (doi:10.1039/c9qo00396g), 2019-01-01
Supplement: c9qo00396g1.pdf [file c9qo00396g1.pdf]

## Supporting Information for

### Nickel-Catalyzed Highly Regioselective Hydrocyanation of Alkenes with $\text{Zn}(\text{CN})_2$

Gaonan Wang, Xin Xie, Wei Xu and Yuanhong Liu\*

*State Key Laboratory of Organometallic Chemistry, Center for Excellence in Molecular  
Synthesis, Shanghai Institute of Organic Chemistry, University of Chinese Academy of  
Sciences, Chinese Academy of Sciences, 345 Lingling Lu, Shanghai 200032, People's  
Republic of China*

*Fax: (+86) 21-64166128, E-mail: [yhliu@sioc.ac.cn](mailto:yhliu@sioc.ac.cn)*

| <b>Contents:</b>                                                              | Page     |
|-------------------------------------------------------------------------------|----------|
| General Methods                                                               | S1-S2    |
| Synthesis and characterization of the new alkene substrate                    | S3-S4    |
| Optimization studies for Ni-catalyzed hydrocyanation of aryl alkenes          | S4-S5    |
| Ni-Catalyzed hydrocyanation of aryl/heteroaryl alkenes                        | S6-S18   |
| Isolation of <b>4a'</b> at the early stage of the hydrocyanation of <b>4a</b> | S18      |
| Synthesis of <b>5</b>                                                         | S18-19   |
| Optimization studies for Ni-catalyzed hydrocyanation of aliphatic alkenes     | S19-S20  |
| Synthesis of <b>6a-6m</b> and <b>7a-7m</b>                                    | S20-S28  |
| Synthesis of <b>6n-6s</b>                                                     | S28-S31  |
| Synthesis of <b>8</b>                                                         | S32      |
| Gram scale study                                                              | S32-S33  |
| Control experiments                                                           | S33-S39  |
| References                                                                    | S40-S41  |
| NMR spectra                                                                   | S42-S149 |

**General Methods.** Unless noted, all reactions were carried out using standard Schlenk

technique under an argon atmosphere or a dry box technique under a nitrogen atmosphere. Tetrahydrofuran and toluene were distilled from sodium and benzophenone. 1,4-dioxane was distilled from sodium. Acetonitrile was dried using Innovative Technology Solvent Purifier. *N,N*-Dimethylformamide (Superdry), Xantphos, DPEphos, dppf, dppp, neocuproine and 2,2':6',2''-terpyridine were purchased from J&K Chemical Company. PPh<sub>3</sub>, P(OPh)<sub>3</sub> and dppb were purchased from TCI. Ni(COD)<sub>2</sub>, NiI<sub>2</sub>, Ni(acac)<sub>2</sub> and Ni(ClO<sub>4</sub>)<sub>2</sub>·6H<sub>2</sub>O were purchased from Strem Chemicals Inc. NiCl<sub>2</sub>(DME) and NiBr<sub>2</sub>(DME) were purchased from Sigma-Aldrich. NiCl<sub>2</sub>·6H<sub>2</sub>O, NiCl<sub>2</sub>, dppe, Zn(CN)<sub>2</sub>, and DMAP were purchased from Alfa Aesar. Zinc powder (99.8%, -100 mesh) and Mn powder (APS<10 micron, 99.6% metals basis) were purchased from Alfa Aesar. Al powder (200 mesh) was purchased from Acros Organics. Before using, zinc powder was stirred with 1 M HCl aqueous solution, filtered and washed thoroughly with water, acetone and diethyl ether and dried under vacuum. Unless noted, all commercial reagents were used without further purification. <sup>1</sup>H and <sup>13</sup>C NMR spectra were recorded at room temperature in CDCl<sub>3</sub> (containing 0.03% TMS) on Varian or Agilent XL-400 MHz spectrometer. <sup>1</sup>H NMR spectra was recorded with tetramethylsilane ( $\delta = 0.00$  ppm) or solvent residual peak (chloroform,  $\delta = 7.26$  ppm) as internal reference; <sup>13</sup>C NMR spectra was recorded with CDCl<sub>3</sub> ( $\delta = 77.00$  ppm) as internal reference. High-resolution mass spectra were obtained by using Waters Micromass GCT Premier mass spectrometer, Agilent Technologies 6224 TOF LC/MS or Thermo Fisher Scientific LTQ FT Ultra mass spectrometers. The IR spectra were measured on a ThermoFisher Nicolet FT-IR spectrometer.

**Note:** It was noted that partial dehydration of NiCl<sub>2</sub>·6H<sub>2</sub>O stored in a nitrogen-filled glove box for a long time might occur. In order to obtain the accurate experimental data, NiCl<sub>2</sub>·6H<sub>2</sub>O used in this study was stored under air (outside of glove box), which was brought into the glove box and used immediately for every experiment.

**Caution!** Zinc cyanide is toxic and should be handled with extra care. The crude reaction mixture or the aqueous layer should not be exposed to acidic conditions as formation of hydrogen cyanide is possible.

Alkenes were synthesized according to the published methods. For the characterization of the new alkene substrates, see the following:



To a solution of 7-hydroxy-3-(4-methoxyphenyl)-4*H*-chromen-4-one (2.68 g, 10 mmol) and Et<sub>3</sub>N (2.02 g, 20 mmol) in DCM (50 mL) was added Tf<sub>2</sub>O (3.10 g, 11 mmol) at 0 °C under Argon, then the mixture was warmed up to room temperature and stirred for another 2 h. The reaction was quenched with saturated NH<sub>4</sub>Cl and extracted with DCM. The combined organic layers were dried over Na<sub>2</sub>SO<sub>4</sub>, filtered and concentrated in vacuum. The residue was purified by column chromatography on silica gel (eluent: dichloromethane/ petroleum ether = 2:1) to give 3-(4-methoxyphenyl)-4-oxo-4*H*-chromen-7-yl trifluoromethanesulfonate (**s-1u**) in 69% yield (2.76 g) as a white solid. M.p.: 125.0-126.3 °C. <sup>1</sup>H NMR (400 M, CDCl<sub>3</sub>): δ 3.84 (s, 3H), 6.97 (d, *J* = 8.8 Hz, 2H), 7.33 (dd, *J* = 8.8, 2.4 Hz, 1H), 7.45 (d, *J* = 2.0 Hz, 1H), 7.49 (d, *J* = 8.8 Hz, 2H), 8.01 (s, 1H), 8.40 (d, *J* = 8.8 Hz, 1H). <sup>13</sup>C NMR (100 M, CDCl<sub>3</sub>): δ 55.26, 111.39, 114.04, 118.47, 118.63 (q, <sup>1</sup>*J*<sub>C-F</sub> = 321.3 Hz), 123.08, 124.14, 125.62, 129.12, 130.00, 152.02, 152.80, 156.27, 159.86, 175.11. IR (neat): 3097, 3076, 3058, 2954, 2907, 2836, 1644, 1612, 1568, 1516, 1424, 1400, 1292, 1250, 1212, 1182, 1168, 1132, 1095, 1029, 952, 883, 864, 824, 801, 788, 782, 689, 659 cm<sup>-1</sup>. HRMS (ESI) calcd for C<sub>17</sub>H<sub>12</sub>F<sub>3</sub>O<sub>6</sub>S[M+H]<sup>+</sup>: 401.0301, found 401.0298.



To a solution of **s-1u** (1.20 g, 3 mmol), Pd(PPh<sub>3</sub>)<sub>2</sub>Cl<sub>2</sub> (210.6 mg, 0.3 mmol) and LiCl (127.2 mg, 3 mol) in DMF (18 mL) was added tributyl(vinyl)stannane (1.05 g, 3.3 mmol) dropwise under Argon. The mixture was heated at 90 °C for 4 h. After completion the reaction

mixture was cooled down to room temperature and diluted with Et<sub>2</sub>O and washed with 1 M HCl(aq.), then washed with saturated NaHCO<sub>3</sub>(aq.) and brine. The combined aqueous layers were extracted once with Et<sub>2</sub>O. The combined organic layers were dried over Na<sub>2</sub>SO<sub>4</sub>, filtered and concentrated in vacuum. The residue was purified by column chromatography on silica gel (eluent: petroleum ether /dichloromethane/ethyl acetate = 6:1:1) to give 3-(4-methoxyphenyl)-7-vinyl-4*H*-chromen-4-one (**1u**) in 76% yield (637.7 mg) as a white solid. M.p.: 154.0-155.1 °C. <sup>1</sup>H NMR (400 M, CDCl<sub>3</sub>): δ 3.83 (s, 3H), 5.48 (d, *J* = 11.2 Hz, 1H), 5.94 (d, *J* = 17.6, Hz, 1H), 6.79 (dd, *J* = 17.6, 11.2 Hz, 1H), 6.96-6.98 (m, 2H), 7.41 (s, 1H), 7.46-7.52 (m, 3H), 7.96 (s, 1H), 8.24 (d, *J* = 8.4 Hz, 1H). <sup>13</sup>C NMR (100 M, CDCl<sub>3</sub>): δ 55.26, 113.91, 115.37, 117.81, 122.83, 123.62, 124.03, 124.97, 126.49, 130.02, 135.32, 142.89, 152.49, 156.44, 159.55, 176.06. IR (neat): 3092, 3076, 3040, 3011, 2972, 2930, 2838, 1624, 1609, 1557, 1513, 1439, 1407, 1358, 1291, 1253, 1233, 1176, 1106, 1024, 985, 927, 901, 886, 878, 830, 821, 802, 791, 767, 717 cm<sup>-1</sup>. HRMS (ESI) calcd for C<sub>18</sub>H<sub>15</sub>O<sub>3</sub> [M+H]<sup>+</sup>: 279.1016, found 279.1007.

### **Optimization studies for Ni-catalyzed hydrocyanation of aryl alkenes.**

#### **General procedure for optimization studies.**

The reaction was conducted in an oven-dried screw-cap vial (4 mL) equipped with a magnetic stir bar. In a nitrogen-filled glove box, NiCl<sub>2</sub>·6H<sub>2</sub>O (3.6 mg, 0.015 mmol) [or other Ni(II) salts], Xantphos (10.4 mg, 0.018 mmol) [or other ligands], Zinc powder (3.9 mg, 0.06 mmol) [or other reductants], Zn(CN)<sub>2</sub> (28.2 mg, 0.24 mmol), dioxane or other solvents (1.5 mL) and 1-methyl-4-vinylbenzene (35.5 mg, 0.3 mmol) were added sequentially to a screw-cap vial. The vial cap was then securely fitted and taken outside the glove box, then H<sub>2</sub>O (30 μL or *x* equiv) was added to the vial. After the reaction mixture was stirred at 80 °C, the mixture was filtered through a pad of silica gel and washed with ethyl acetate. The solvent was evaporated under the reduced pressure and the residue was dissolved in CDCl<sub>3</sub>. The NMR yields were obtained by <sup>1</sup>H NMR analysis of the crude mixture using mesitylene (36.1 mg, 0.3 mmol) as an internal standard. In some cases, the reaction mixture was quenched by 10% NH<sub>3</sub>·H<sub>2</sub>O aqueous solution and extracted with ethyl acetate. The combined organic layers were washed with water and saturated NaCl solution, dried over anhydrous Na<sub>2</sub>SO<sub>4</sub> (for

entries 1-4).

**Table S1.** Optimization studies for Ni-catalyzed hydrocyanation of aryl alkenes.<sup>a</sup>



| entry                 | deviation from conditions shown in eq 1                                                               | yield (%) <sup>b</sup> |          |
|-----------------------|-------------------------------------------------------------------------------------------------------|------------------------|----------|
|                       |                                                                                                       | 2a                     | 3a       |
| 1                     | none                                                                                                  | 89                     | 3        |
| 2                     | dioxane/H <sub>2</sub> O = 25/1                                                                       | 0                      | 0        |
| 3                     | 1.0 equiv H <sub>2</sub> O was used                                                                   | 33                     | 9.5      |
| 4                     | 2.0 equiv H <sub>2</sub> O was used                                                                   | 75                     | 10       |
| 5                     | NiCl <sub>2</sub> instead of NiCl <sub>2</sub> ·6H <sub>2</sub> O                                     | 60                     | 3        |
| 6                     | NiCl <sub>2</sub> (DME) instead of NiCl <sub>2</sub> ·6H <sub>2</sub> O                               | 87                     | 4        |
| 7                     | NiBr <sub>2</sub> (DME) instead of NiCl <sub>2</sub> ·6H <sub>2</sub> O                               | 78                     | 13       |
| 8                     | NiI <sub>2</sub> instead of NiCl <sub>2</sub> ·6H <sub>2</sub> O                                      | 79                     | 11       |
| 9                     | Ni(ClO <sub>4</sub> ) <sub>2</sub> ·6H <sub>2</sub> O instead of NiCl <sub>2</sub> ·6H <sub>2</sub> O | 5                      | <1       |
| 10                    | Ni(acac) <sub>2</sub> instead of NiCl <sub>2</sub> ·6H <sub>2</sub> O                                 | 0                      | 0        |
| 11                    | 10 mol% PPh <sub>3</sub> or P(OPh) <sub>3</sub> instead of 6 mol% dppf                                | 0                      | 0        |
| 12                    | dppe instead of dppf                                                                                  | 8                      | 4        |
| 13                    | dppp instead of dppf                                                                                  | 37                     | 8        |
| 14                    | dppb instead of dppf                                                                                  | 10                     | 2.5      |
| 15                    | Xantphos instead of dppf                                                                              | 96                     | 1        |
| 16                    | DPEPhos instead of dppf                                                                               | 3                      | 0        |
| 17                    | neocuproine instead of dppf                                                                           | 0                      | 0        |
| 18                    | terpyridine instead of dppf                                                                           | 0                      | 0        |
| 19                    | Xantphos instead of dppf, toluene instead of dioxane                                                  | 0                      | 0        |
| 20                    | Xantphos instead of dppf, MeCN instead of dioxane                                                     | 49                     | 33       |
| 21                    | Xantphos instead of dppf, THF instead of dioxane                                                      | 95                     | 1        |
| 22                    | Xantphos instead of dppf, DMF instead of dioxane                                                      | 26                     | 0        |
| <b>23<sup>c</sup></b> | <b>Xantphos instead of dppf, 0.6 equiv Zn(CN)<sub>2</sub> was used</b>                                | <b>97</b>              | <b>1</b> |
| 24 <sup>c,d</sup>     | Xantphos instead of dppf, Mn instead of Zn                                                            | 73                     | <1       |
| 25 <sup>c,d</sup>     | Xantphos instead of dppf, Al instead of Zn                                                            | 2                      | 0        |
| 26 <sup>c,d</sup>     | Without either of NiCl <sub>2</sub> ·6H <sub>2</sub> O, Xantphos or Zn                                | 0                      | 0        |
| 27 <sup>c,d</sup>     | Without H <sub>2</sub> O                                                                              | 25                     | 0        |

<sup>a</sup>**1a** (0.3 mmol), Zn(CN)<sub>2</sub> (0.24 mmol), NiCl<sub>2</sub>·6H<sub>2</sub>O (0.015 mmol), dppf (0.018 mmol) and zinc powder (0.06 mmol) in dioxane/H<sub>2</sub>O (1.5 mL/0.03 mL) at 80 °C for 12 h.

<sup>b</sup>Determined by <sup>1</sup>H NMR of the crude reaction mixture using mesitylene as an internal standard. <sup>c</sup>The reaction time was 4 h. <sup>d</sup>0.6 equiv Zn(CN)<sub>2</sub> was used.

## Ni-Catalyzed hydrocyanation of aryl/heteroaryl alkenes.

### Typical procedure for the synthesis of **2a**.



The reaction was conducted in an oven-dried screw-cap vial (8 mL) equipped with a magnetic stir bar. The vial containing NiCl<sub>2</sub>·6H<sub>2</sub>O was equipped with a septum cap, which was pierced by a needle and introduced into the antechamber of nitrogen-filled glovebox. Before transferring into the inside of the glovebox, it was evacuated and back-filled with nitrogen for three times (ca. 5 min). In a nitrogen-filled glove box, NiCl<sub>2</sub>·6H<sub>2</sub>O (5.9 mg, 0.025 mmol), Xantphos (17.4 mg, 0.03 mmol), Zinc powder (6.5 mg, 0.1 mmol), Zn(CN)<sub>2</sub> (35.2 mg, 0.3 mmol), dioxane (2.5 mL) and 1-methyl-4-vinylbenzene (59.1 mg, 0.5 mmol) were added sequentially to a screw-cap vial. The vial cap was then securely fitted and taken outside the glove box, then H<sub>2</sub>O (50 μL) was added to the vial. After the reaction mixture was stirred at 80 °C for 4 h, the mixture was filtered through a pad of silica gel and washed with ethyl acetate. The solvent was evaporated under the reduced pressure and the residue was purified by column chromatography on silica gel (eluent: petroleum ether/ethyl acetate = 100:1 to 50:1) to give the desired product **2a** in 93% yield (67.5 mg) as a colorless oil.



**2-*p*-Tolylpropanenitrile (2a).** <sup>1</sup>H NMR (400 M, CDCl<sub>3</sub>): δ 1.62 (d, *J* = 7.2 Hz, 3H), 2.35 (s, 3H), 3.86 (q, *J* = 7.2 Hz, 1H), 7.18 (d, *J* = 8.0 Hz, 2H), 7.25 (d, *J* = 8.4 Hz, 2H). <sup>13</sup>C NMR (100 M, CDCl<sub>3</sub>): δ 20.98, 21.44, 30.80, 121.73, 126.52, 129.71, 134.05, 137.78. The spectroscopic data are in agreement with that previously reported.<sup>1</sup>



**2-Phenylpropanenitrile (2b).** NiCl<sub>2</sub>·6H<sub>2</sub>O (5.9 mg, 0.025 mmol), Xantphos (17.4 mg, 0.03 mmol), Zinc powder (6.5 mg, 0.1 mmol), Zn(CN)<sub>2</sub> (35.2 mg, 0.3 mmol), dioxane (2.5 mL), styrene (52.1 mg, 0.5 mmol) and H<sub>2</sub>O (50 μL) were stirred at 80 °C for 4 h. Column chromatography on silica gel (eluent: petroleum ether/ethyl acetate = 50:1) afforded the product **2b** in 88% yield (57.4 mg) as a colorless oil. <sup>1</sup>H NMR (400 M, CDCl<sub>3</sub>): δ 1.62 (d, *J* = 7.2 Hz, 3H), 3.89 (q, *J* = 7.2 Hz, 1H), 7.29-7.40 (m, 5H). <sup>13</sup>C NMR (100 M, CDCl<sub>3</sub>): δ 21.34, 31.10, 121.51, 126.58, 127.92, 129.02, 136.96. The spectroscopic data are in agreement with that previously reported.<sup>1</sup>



NiCl<sub>2</sub>·6H<sub>2</sub>O (5.9 mg, 0.025 mmol), dppf (16.6 mg, 0.03 mmol), Zinc powder (32.7 mg, 0.5 mmol), Zn(CN)<sub>2</sub> (35.2 mg, 0.3 mmol), dioxane (2.5 mL), 1-methyl-2-vinylbenzene (59.1 mg, 0.5 mmol) and H<sub>2</sub>O (50 μL) were stirred at 80 °C for 4 h. Column chromatography on silica gel (eluent: petroleum ether/ethyl acetate = 50:1 to 20:1) afforded the product **2c** in 63% yield (46.0 mg) as a colorless oil and **3c** in 10% yield (7.0 mg) as a colorless oil.

**2-*o*-Tolylpropanenitrile (2c).** <sup>1</sup>H NMR (400 M, CDCl<sub>3</sub>): δ 1.60 (d, *J* = 7.2 Hz, 3H), 2.35 (s, 3H), 4.03 (q, *J* = 7.2 Hz, 1H), 7.17-7.27 (m, 3H), 7.43-7.45 (m, 1H). <sup>13</sup>C NMR (100 M, CDCl<sub>3</sub>): δ 18.90, 19.93, 28.05, 121.72, 126.59, 126.88, 128.02, 130.90, 134.69, 135.17. The spectroscopic data are in agreement with that previously reported.<sup>2</sup>

**3-*o*-Tolylpropanenitrile (3c).** <sup>1</sup>H NMR (400 M, CDCl<sub>3</sub>): δ 2.33 (s, 3H), 2.58 (t, *J* = 7.6 Hz, 2H), 2.98 (t, *J* = 7.6 Hz, 2H), 7.15-7.20 (m, 4H). <sup>13</sup>C NMR (100 M, CDCl<sub>3</sub>): δ 17.97, 19.14, 28.84, 119.19, 126.45, 127.33, 128.67, 130.61, 135.74, 136.18. The spectroscopic data are in agreement with that previously reported.<sup>3</sup>



**2-(4-Isobutylphenyl)propanenitrile (2d).** NiCl<sub>2</sub>·6H<sub>2</sub>O (5.9 mg, 0.025 mmol), Xantphos (17.4 mg, 0.03 mmol), Zinc powder (6.5 mg, 0.1 mmol), Zn(CN)<sub>2</sub> (35.2 mg, 0.3 mmol), dioxane (2.5 mL), 1-isobutyl-4-vinylbenzene (80.1 mg, 0.5 mmol) and H<sub>2</sub>O (50 μL) were stirred at 80 °C for 6 h. Purification by preparative TLC on silica gel (eluent: petroleum ether/ethyl acetate = 50:1) afforded the product **2d** in 75% yield (70.0 mg) as a colorless oil. <sup>1</sup>H NMR (400 M, CDCl<sub>3</sub>): δ 0.90 (d, *J* = 6.8 Hz, 6H), 1.62 (d, *J* = 7.6 Hz, 3H), 1.80-1.90 (m, 1H), 2.47 (d, *J* = 7.2 Hz, 2H), 3.86 (q, *J* = 7.2 Hz, 1H), 7.15 (d, *J* = 8.0 Hz, 2H), 7.25 (d, *J* = 8.0 Hz, 2H). <sup>13</sup>C NMR (100 M, CDCl<sub>3</sub>): δ 21.34, 22.22, 30.09, 30.78, 44.85, 121.73, 126.34, 129.72, 134.22, 141.53. The spectroscopic data are in agreement with that previously reported.<sup>4</sup>



**2-(4-Methoxyphenyl)propanenitrile (2e).** NiCl<sub>2</sub>·6H<sub>2</sub>O (5.9 mg, 0.025 mmol), Xantphos (17.4 mg, 0.03 mmol), Zinc powder (6.5 mg, 0.1 mmol), Zn(CN)<sub>2</sub> (35.2 mg, 0.3 mmol), dioxane (2.5 mL), 1-methoxy-4-vinylbenzene (67.1 mg, 0.5 mmol) and H<sub>2</sub>O (50 μL) were stirred at 80 °C for 4 h. Column chromatography on silica gel (eluent: petroleum ether/ethyl acetate = 30:1) afforded the product **2e** in 92% yield (73.9 mg) as a colorless oil. <sup>1</sup>H NMR (400 M, CDCl<sub>3</sub>): δ 1.60 (d, *J* = 7.6 Hz, 3H), 3.80 (s, 3H), 3.84 (q, *J* = 7.6 Hz, 1H), 6.89-6.92 (m, 2H), 7.25-7.27 (m, 2H). <sup>13</sup>C NMR (100 M, CDCl<sub>3</sub>): δ 21.39, 30.31, 55.22, 114.36, 121.79, 127.72, 128.98, 159.18. The spectroscopic data are in agreement with that previously reported.<sup>5</sup>





**2-(3,5-Dimethoxyphenyl)propanenitrile (2f).** NiCl<sub>2</sub>·6H<sub>2</sub>O (5.9 mg, 0.025 mmol), Xantphos (17.4 mg, 0.03 mmol), Zinc powder (6.5 mg, 0.1 mmol), Zn(CN)<sub>2</sub> (35.2 mg, 0.3 mmol), dioxane (2.5 mL), 1,3-dimethoxy-5-vinylbenzene (82.1 mg, 0.5 mmol) and H<sub>2</sub>O (50 μL) were stirred at 80 °C for 4 h. Column chromatography on silica gel (eluent: petroleum ether/ethyl acetate = 30:1) afforded the product **2f** in 95% yield (91.3mg) as a colorless oil. <sup>1</sup>H NMR (400 M, CDCl<sub>3</sub>): δ 1.62 (d, *J* = 7.2 Hz, 3H), 3.79-3.84 (m, 7H), 6.40 (t, *J* = 2.0 Hz, 1H), 6.49 (d, *J* = 2.0 Hz, 2H). <sup>13</sup>C NMR (100 M, CDCl<sub>3</sub>): δ 21.12, 31.19, 55.24, 99.52, 104.75, 121.35, 139.12, 161.14. IR (neat): 2985, 2941, 2839, 2242, 1596, 1457, 1429, 1349, 1328, 1296, 1204, 1152, 1051, 836, 735, 694 cm<sup>-1</sup>. HRMS (ESI) calcd for C<sub>11</sub>H<sub>14</sub>NO<sub>2</sub> [M+H]<sup>+</sup>: 192.1019, found 192.1017.



**2-(4-Hydroxyphenyl)propanenitrile (2g).** NiCl<sub>2</sub>·6H<sub>2</sub>O (5.9 mg, 0.025 mmol), Xantphos (17.4 mg, 0.03 mmol), Zinc powder (6.5 mg, 0.1 mmol), Zn(CN)<sub>2</sub> (35.2 mg, 0.3 mmol), dioxane (2.5 mL), 4-vinylphenol (60.1 mg, 0.5 mmol) and H<sub>2</sub>O (50 μL) were stirred at 80 °C for 4 h. Column chromatography on silica gel (eluent: petroleum ether/ethyl acetate = 5:1 to 3:1) afforded the product **2g** in 87% yield (63.7 mg) as a colorless oil. <sup>1</sup>H NMR (400 M, CDCl<sub>3</sub>): δ 1.59 (d, *J* = 7.6 Hz, 3H), 3.84 (q, *J* = 7.2 Hz, 1H), 6.59 (s, 1H), 6.82-6.86 (m, 2H), 7.17 (d, *J* = 8.8 Hz, 2H). <sup>13</sup>C NMR (100 M, CDCl<sub>3</sub>): δ 21.21, 30.30, 115.97, 121.95, 127.88, 128.44, 155.67. IR (neat): 3344, 3022, 2988, 2936, 2254, 1613, 1591, 1515, 1441, 1372, 1356, 1343, 1274, 1264, 1216, 1185, 1174, 1107, 1083, 1054, 987, 837, 818, 732 cm<sup>-1</sup>. HRMS (EI) calcd for C<sub>9</sub>H<sub>9</sub>NO [M]<sup>+</sup>: 147.0684, found 147.0679.



**2-(4-Aminophenyl)propanenitrile (2h).** NiCl<sub>2</sub>·6H<sub>2</sub>O (5.9 mg, 0.025 mmol), Xantphos (17.4 mg, 0.03 mmol), Zinc powder (6.5 mg, 0.1 mmol), Zn(CN)<sub>2</sub> (35.2 mg, 0.3 mmol), dioxane (2.5 mL), 4-vinylaniline (59.6 mg, 0.5 mmol) and H<sub>2</sub>O (50 μL) were stirred at 80 °C for 4 h. Column chromatography on silica gel (eluent: petroleum ether/ethyl acetate = 1:1) afforded the product **2h** in 89% yield (64.7 mg) as a light yellow oil. <sup>1</sup>H NMR (400 M, CDCl<sub>3</sub>): δ 1.56 (d, *J* = 7.2 Hz, 3H), 3.72 (s, 2H), 3.76 (q, *J* = 7.2 Hz, 1H), 6.64 (d, *J* = 8.4 Hz, 2H), 7.09 (d, *J* = 8.8 Hz, 2H). <sup>13</sup>C NMR (100 M, CDCl<sub>3</sub>): δ 21.25, 30.19, 115.20, 122.10, 126.39, 127.46, 146.18. IR (neat): 3460, 3369, 3225, 2983, 2924, 2853, 2238, 1623, 1516, 1452, 1378, 1285, 1183, 1130, 1084, 988, 826 cm<sup>-1</sup>. HRMS (ESI) calcd for C<sub>9</sub>H<sub>11</sub>N<sub>2</sub> [M+H]<sup>+</sup>: 147.0917, found 147.0914.



**2-(4-Fluorophenyl)propanenitrile (2i).** NiCl<sub>2</sub>·6H<sub>2</sub>O (5.9 mg, 0.025 mmol), Xantphos (17.4 mg, 0.03 mmol), Zinc powder (6.5 mg, 0.1 mmol), Zn(CN)<sub>2</sub> (35.2 mg, 0.3 mmol), dioxane (2.5 mL), 1-fluoro-4-vinylbenzene (61.1 mg, 0.5 mmol) and H<sub>2</sub>O (50 μL) were stirred at 80 °C for 4 h. Column chromatography on silica gel (eluent: petroleum ether/ethyl acetate = 40:1 to 20:1) afforded the product **2i** in 81% yield (60.4 mg) as a colorless oil. <sup>1</sup>H NMR (400 M, CDCl<sub>3</sub>): δ 1.63 (d, *J* = 7.2 Hz, 3H), 3.90 (q, *J* = 7.2 Hz, 1H), 7.05-7.09 (m, 2H), 7.31-7.35 (m, 2H). <sup>13</sup>C NMR (100 M, CDCl<sub>3</sub>): δ 21.37, 30.44, 115.97 (d, <sup>2</sup>*J*<sub>C-F</sub> = 22.1 Hz), 121.34, 128.35 (d, <sup>3</sup>*J*<sub>C-F</sub> = 8.4 Hz), 132.77 (d, <sup>4</sup>*J*<sub>C-F</sub> = 3.8 Hz), 162.22 (d, <sup>1</sup>*J*<sub>C-F</sub> = 247.3 Hz). The spectroscopic data are in agreement with that previously reported.<sup>5</sup>



**2-(4-(Trifluoromethyl)phenyl)propanenitrile (2j).** NiCl<sub>2</sub>·6H<sub>2</sub>O (5.9 mg, 0.025 mmol), Xantphos (17.4 mg, 0.03 mmol), Zinc powder (6.5 mg, 0.1 mmol), Zn(CN)<sub>2</sub> (35.2 mg, 0.3 mmol), dioxane (2.5 mL), 1-(trifluoromethyl)-4-vinylbenzene (86.1 mg, 0.5 mmol) and H<sub>2</sub>O (50 μL) were stirred at 80 °C for 4 h. Column chromatography on silica gel (eluent: petroleum ether/ethyl acetate = 30:1) afforded the product **2j** in 84% yield (84.0 mg) as a colorless oil. <sup>1</sup>H NMR (400 M, CDCl<sub>3</sub>): δ 1.67 (d, *J* = 7.2 Hz, 3H), 3.99 (q, *J* = 7.2 Hz, 1H), 7.50 (d, *J* = 8.0 Hz, 2H), 7.66 (d, *J* = 8.0 Hz, 2H). <sup>13</sup>C NMR (100 M, CDCl<sub>3</sub>): δ 21.13, 31.01, 120.72, 123.75 (q, <sup>1</sup>*J*<sub>C-F</sub> = 272.4 Hz), 126.08 (q, <sup>3</sup>*J*<sub>C-F</sub> = 3.8 Hz), 127.15, 130.35 (q, <sup>2</sup>*J*<sub>C-F</sub> = 32.9 Hz), 140.94 (q, <sup>5</sup>*J*<sub>C-F</sub> = 1.5 Hz). The spectroscopic data are in agreement with that previously reported.<sup>6</sup>



**4-(1-Cyanoethyl)benzonitrile (2k).** NiCl<sub>2</sub>·6H<sub>2</sub>O (5.9 mg, 0.025 mmol), Xantphos (17.4 mg, 0.03 mmol), Zinc powder (6.5 mg, 0.1 mmol), Zn(CN)<sub>2</sub> (35.2 mg, 0.3 mmol), dioxane (2.5 mL), 4-vinylbenzonitrile (64.6 mg, 0.5 mmol) and H<sub>2</sub>O (50 μL) were stirred at 80 °C for 4 h. Column chromatography on silica gel (eluent: petroleum ether/ethyl acetate = 10:1) afforded the product **2k** in 85% yield (66.2 mg) as a colorless oil. <sup>1</sup>H NMR (400 M, CDCl<sub>3</sub>): δ 1.68 (d, *J* = 7.6 Hz, 3H), 4.02 (q, *J* = 7.2 Hz, 1H), 7.52 (d, *J* = 8.4 Hz, 2H), 7.71 (d, *J* = 8.4 Hz, 2H). <sup>13</sup>C NMR (100 M, CDCl<sub>3</sub>): δ 20.93, 31.11, 112.01, 118.01, 120.26, 127.52, 132.81, 142.00. The spectroscopic data are in agreement with that previously reported.<sup>7</sup>



**2l**

**2-(4-(4,4,5,5-Tetramethyl-1,3,2-dioxaborolan-2-yl)phenyl)propanenitrile (2l).**

NiCl<sub>2</sub>·6H<sub>2</sub>O (5.9 mg, 0.025 mmol), Xantphos (17.4 mg, 0.03 mmol), Zinc powder (6.5 mg, 0.1 mmol), Zn(CN)<sub>2</sub> (35.2 mg, 0.3 mmol), dioxane (2.5 mL), 4,4,5,5-tetramethyl-2-(4-vinylphenyl)-1,3,2-dioxaborolane (115.1 mg, 0.5 mmol) and H<sub>2</sub>O (50 μL) were stirred at 80 °C for 4 h. Column chromatography on silica gel (eluent: petroleum ether/ethyl acetate = 30:1 to 10:1) afforded the product **2l** in 77% yield (98.8 mg) as a white solid. M.p.: 100.1-101.4 °C. <sup>1</sup>H NMR (400 M, CDCl<sub>3</sub>): δ 1.34 (s, 12H), 1.62 (d, *J* = 7.2 Hz, 3H), 3.90 (q, *J* = 7.2 Hz, 1H), 7.36 (d, *J* = 8.0 Hz, 2H), 7.83 (d, *J* = 8.0 Hz, 2H). <sup>13</sup>C NMR (100 M, CDCl<sub>3</sub>): δ 21.29, 24.72, 31.23, 83.82, 121.24, 125.91, 135.47, 139.88. The carbon directly attached to the boron atom was not detected, likely due to quadrupolar broadening. IR (neat): 2983, 2920, 2239, 1614, 1521, 1454, 1412, 1398, 1358, 1333, 1282, 1267, 1167, 1138, 1094, 1021, 963, 856, 833, 675, 656 cm<sup>-1</sup>. HRMS (ESI) calcd for C<sub>15</sub>H<sub>24</sub>O<sub>2</sub>N<sub>2</sub><sup>10</sup>B [M+NH<sub>4</sub>]<sup>+</sup>: 274.1962, found 274.1961.



**2m**

**2-(Biphenyl-4-yl)propanenitrile (2m).** NiCl<sub>2</sub>·6H<sub>2</sub>O (5.9 mg, 0.025 mmol), Xantphos (17.4 mg, 0.03 mmol), Zinc powder (6.5 mg, 0.1 mmol), Zn(CN)<sub>2</sub> (35.2 mg, 0.3 mmol), 4-vinyl-1,1'-biphenyl (90.1 mg, 0.5 mmol), dioxane (2.5 mL) and H<sub>2</sub>O (50 μL) were stirred at 80 °C for 4 h. Column chromatography on silica gel (eluent: petroleum ether/ethyl acetate = 40:1 to 20:1) afforded the product **2m** in 95% yield (98.3 mg) as a white solid. <sup>1</sup>H NMR (400 M, CDCl<sub>3</sub>): δ 1.63 (d, *J* = 7.2 Hz, 3H), 3.90 (q, *J* = 7.2 Hz, 1H), 7.32-7.44 (m, 5H), 7.57 (t, *J* = 8.4 Hz, 4H). <sup>13</sup>C NMR (100 M, CDCl<sub>3</sub>): δ 21.26, 30.76, 121.47, 126.93, 127.03, 127.48, 127.67, 128.74, 135.89, 140.07, 140.88. The spectroscopic data are in agreement with that previously reported.<sup>5</sup>



**2-(Naphthalen-2-yl)propanenitrile (2n).** NiCl<sub>2</sub>·6H<sub>2</sub>O (5.9 mg, 0.025 mmol), Xantphos (17.4 mg, 0.03 mmol), Zinc powder (6.5 mg, 0.1 mmol), Zn(CN)<sub>2</sub> (35.2 mg, 0.3 mmol), 2-vinylnaphthalene (77.1 mg, 0.5 mmol), dioxane (2.5 mL) and H<sub>2</sub>O (50 μL) were stirred at 80 °C for 4 h. Column chromatography on silica gel (eluent: petroleum ether/ethyl acetate = 40:1 to 20:1) afforded the product **2n** in 91% yield (82.4 mg) as a white solid. <sup>1</sup>H NMR (400 M, CDCl<sub>3</sub>): δ 1.66 (d, *J* = 7.2 Hz, 3H), 3.99 (q, *J* = 7.2 Hz, 1H), 7.37 (dd, *J* = 8.6, 2.0 Hz, 1H), 7.45-7.50 (m, 2H), 7.79-7.83 (m, 4H). <sup>13</sup>C NMR (100 M, CDCl<sub>3</sub>): δ 21.22, 31.20, 121.50, 124.26, 125.41, 126.33, 126.57, 127.57, 127.70, 128.98, 132.60, 133.14, 134.19. The spectroscopic data are in agreement with that previously reported.<sup>1</sup>



**2-(6-Methoxynaphthalen-2-yl)propanenitrile (2o).** NiCl<sub>2</sub>·6H<sub>2</sub>O (5.9 mg, 0.025 mmol), Xantphos (17.4 mg, 0.03 mmol), Zinc powder (6.5 mg, 0.1 mmol), Zn(CN)<sub>2</sub> (35.2 mg, 0.3 mmol), 2-methoxy-6-vinylnaphthalene (82.1 mg, 0.5 mmol), dioxane (2.5 mL) and H<sub>2</sub>O (50 μL) were stirred at 80 °C for 8 h. Column chromatography on silica gel (eluent: petroleum ether/ethyl acetate = 30:1) afforded the product **2o** in 98% yield (103.7 mg) as a white solid. <sup>1</sup>H NMR (400 M, CDCl<sub>3</sub>): δ 1.65 (d, *J* = 7.6 Hz, 3H), 3.87 (s, 3H), 3.95 (q, *J* = 7.2 Hz, 1H), 7.09 (d, *J* = 2.0 Hz, 1H), 7.15 (dd, *J* = 9.0, 2.0 Hz, 1H), 7.34 (dd, *J* = 8.4, 1.2 Hz, 1H), 7.67-7.72 (m, 3H). <sup>13</sup>C NMR (100 M, CDCl<sub>3</sub>): δ 21.19, 30.98, 55.12, 105.49, 119.37, 121.65, 124.75, 125.18, 127.72, 128.57, 129.12, 131.85, 133.83, 157.90. The spectroscopic data are in agreement with that previously reported.<sup>8</sup>



**3-Phenylbutanenitrile (2p).** NiCl<sub>2</sub>·6H<sub>2</sub>O (5.9 mg, 0.025 mmol), dppf (16.6 mg, 0.03 mmol), Zinc powder (32.7 mg, 0.5 mmol), Zn(CN)<sub>2</sub> (35.2 mg, 0.3 mmol), ZnI<sub>2</sub> (79.8 mg, 0.25 mmol), MeCN (2.5 mL), prop-1-en-2-ylbenzene (59.1 mg, 0.5 mmol) and H<sub>2</sub>O (18 μL) were stirred at 80 °C for 8 h. Column chromatography on silica gel (eluent: petroleum ether/ethyl acetate = 30:1) afforded the product **2p** in 75% yield (54.4 mg) as a colorless oil. <sup>1</sup>H NMR (400 M, CDCl<sub>3</sub>): δ 1.45 (d, *J* = 6.8 Hz, 3H), 2.51-2.64 (m, 2H), 3.11-3.20 (m, 1H), 7.23-7.28 (m, 3H), 7.33-7.36 (m, 2H). <sup>13</sup>C NMR (100 M, CDCl<sub>3</sub>): δ 20.60, 26.27, 36.44, 118.55, 126.48, 127.25, 128.79, 143.07. The spectroscopic data are in agreement with that previously reported.<sup>9</sup>



**2-(Pyridin-3-yl)propanenitrile (2q).** NiCl<sub>2</sub>·6H<sub>2</sub>O (5.9 mg, 0.025 mmol), Xantphos (17.4 mg, 0.03 mmol), Zinc powder (6.5 mg, 0.1 mmol), Zn(CN)<sub>2</sub> (35.2 mg, 0.3 mmol), dioxane (2.5 mL), 3-vinylpyridine (52.6 mg, 0.5 mmol) and H<sub>2</sub>O (50 μL) were stirred at 80 °C for 4 h. Column chromatography on silica gel (eluent: petroleum ether/ethyl acetate = 1:1) afforded the product **2q** in 83% yield (54.6 mg) as a colorless oil. <sup>1</sup>H NMR (400 M, CDCl<sub>3</sub>): δ 1.68 (d, *J* = 7.2 Hz, 3H), 3.98 (q, *J* = 7.2 Hz, 1H), 7.34-7.37 (m, 1H), 7.75 (d, *J* = 8.0 Hz, 1H), 8.60-8.62 (m, 2H). <sup>13</sup>C NMR (100 M, CDCl<sub>3</sub>): δ 20.99, 28.78, 120.42, 123.74, 132.72, 134.12, 148.02, 149.34. IR (neat): 3037, 2988, 2941, 2243, 1577, 1481, 1455, 1426, 1301, 1181, 1129, 1089, 1043, 1027, 990, 810, 711 cm<sup>-1</sup>. HRMS (ESI) calcd for C<sub>8</sub>H<sub>9</sub>N<sub>2</sub> [M+H]<sup>+</sup>: 133.0760, found 133.0758.



**3-(Pyridin-2-yl)propanenitrile (2r).** NiCl<sub>2</sub>·6H<sub>2</sub>O (5.9 mg, 0.025 mmol), Xantphos (17.4 mg,

0.03 mmol), Zinc powder (6.5 mg, 0.1 mmol), Zn(CN)<sub>2</sub> (35.2 mg, 0.3 mmol), dioxane (2.5 mL), 2-vinylpyridine (52.6 mg, 0.5 mmol) and H<sub>2</sub>O (50 μL) were stirred at 80 °C for 3.5 h. Column chromatography on silica gel (eluent: petroleum ether/ethyl acetate = 1:1) afforded the product **2r** in 91% yield (60.4 mg) as a colorless oil. <sup>1</sup>H NMR (400 M, CDCl<sub>3</sub>): δ 2.84 (t, *J* = 7.2 Hz, 2H), 3.11 (t, *J* = 7.2 Hz, 2H), 7.17-7.23 (m, 2H), 7.65 (td, *J* = 7.6, 0.8 Hz, 1H), 8.55 (d, *J* = 4.8 Hz, 1H). <sup>13</sup>C NMR (100 M, CDCl<sub>3</sub>): δ 16.37, 33.09, 119.27, 121.98, 122.90, 136.55, 149.36, 156.97. The spectroscopic data are in agreement with that previously reported.<sup>10</sup>



**2-(1H-Indol-3-yl)propanenitrile (2s).** NiCl<sub>2</sub>·6H<sub>2</sub>O (5.9 mg, 0.025 mmol), Xantphos (17.4 mg, 0.03 mmol), Zinc powder (6.5 mg, 0.1 mmol), Zn(CN)<sub>2</sub> (35.2 mg, 0.3 mmol), 3-vinyl-1H-indole (71.6 mg, 0.5 mmol), dioxane (2.5 mL) and H<sub>2</sub>O (50 μL) were stirred at 80 °C for 8 h. Column chromatography on silica gel (eluent: petroleum ether/ethyl acetate = 10:1) afforded the product **2s** in 87% yield (73.8 mg) as a colorless oil. <sup>1</sup>H NMR (400 M, CDCl<sub>3</sub>): δ 1.67 (d, *J* = 7.2 Hz, 3H), 4.08 (q, *J* = 7.2 Hz, 1H), 7.04 (d, *J* = 1.6 Hz, 1H), 7.12-7.22 (m, 2H), 7.31 (d, *J* = 8.0 Hz, 1H), 7.62 (d, *J* = 8.0 Hz, 1H), 8.28 (s, 1H). <sup>13</sup>C NMR (100 M, CDCl<sub>3</sub>): δ 19.39, 22.66, 111.36, 111.62, 118.17, 119.86, 121.66, 121.98, 122.50, 124.94, 136.33. IR (neat): 3409, 3063, 2983, 2943, 2240, 1618, 1457, 1421, 1355, 1339, 1248, 1225, 1100, 1032, 1012, 909, 819, 765, 739 cm<sup>-1</sup>. HRMS (EI) calcd for C<sub>11</sub>H<sub>10</sub>N<sub>2</sub> [M]<sup>+</sup>: 170.0844, found 170.0842.



**2-(Benzo[b]thiophen-2-yl)propanenitrile (2t).** NiCl<sub>2</sub>·6H<sub>2</sub>O (5.9 mg, 0.025 mmol), Xantphos

(17.4 mg, 0.03 mmol), Zinc powder (6.5 mg, 0.1 mmol), Zn(CN)<sub>2</sub> (35.2 mg, 0.3 mmol), 2-vinylbenzo[*b*]thiophene (80.1 mg, 0.5 mmol), dioxane (2.5 mL) and H<sub>2</sub>O (50 μL) were stirred at 80 °C for 8 h. Column chromatography on silica gel (eluent: petroleum ether/ethyl acetate = 30:1) afforded the product **2t** in 84% yield (79.0 mg) as a white solid. M.p.: 81.0-82.0 °C. <sup>1</sup>H NMR (400 M, CDCl<sub>3</sub>): δ 1.73 (d, *J* = 7.2 Hz, 3H), 4.16 (q, *J* = 7.2 Hz, 1H), 7.27-7.36 (m, 3H), 7.69-7.71 (m, 1H), 7.76 (d, *J* = 7.6 Hz, 1H). <sup>13</sup>C NMR (100 M, CDCl<sub>3</sub>): δ 20.87, 27.20, 120.09, 122.11, 122.17, 123.58, 124.63, 124.69, 138.96, 139.24, 139.66. IR (neat): 3056, 2993, 2983, 2938, 2925, 2241, 1459, 1435, 1376, 1205, 1156, 1143, 1129, 1057, 967, 943, 876, 841, 823, 728, 679, 666 cm<sup>-1</sup>. HRMS (EI) calcd for C<sub>11</sub>H<sub>9</sub>NS [M]<sup>+</sup>: 187.0456, found 187.0459.



**2-(3-(4-Methoxyphenyl)-4-oxo-4*H*-chromen-7-yl)propanenitrile (2u).** NiCl<sub>2</sub>·6H<sub>2</sub>O (5.9 mg, 0.025 mmol), Xantphos (17.4 mg, 0.03 mmol), Zinc powder (6.5 mg, 0.1 mmol), Zn(CN)<sub>2</sub> (35.2 mg, 0.3 mmol), 3-(4-methoxyphenyl)-7-vinyl-4*H*-chromen-4-one (139.2 mg, 0.5 mmol), dioxane (2.5 mL) and H<sub>2</sub>O (50 μL) were stirred at 80 °C for 4 h. Column chromatography on silica gel (eluent: petroleum ether/ethyl acetate = 3:1) afforded the product **2u** in 86% yield (131.0 mg) as a white solid. M.p.: 147.8-149.1 °C. <sup>1</sup>H NMR (400 M, CDCl<sub>3</sub>): δ 1.70 (d, *J* = 7.2 Hz, 3H), 3.82 (s, 3H), 4.05 (q, *J* = 7.2 Hz, 1H), 6.96 (d, *J* = 8.8 Hz, 2H), 7.37 (d, *J* = 8.4 Hz, 1H), 7.49 (d, *J* = 8.8 Hz, 3H), 7.99 (s, 1H), 8.29 (d, *J* = 8.4 Hz, 1H). <sup>13</sup>C NMR (100 M, CDCl<sub>3</sub>): δ 20.99, 31.04, 55.16, 113.83, 116.18, 120.41, 123.54, 123.84, 125.04, 127.38, 129.89, 142.81, 152.51, 156.09, 159.54, 175.66. IR (neat): 3081, 2961, 2937, 2909, 2833, 2246, 1637, 1624, 1606, 1574, 1562, 1511, 1437, 1371, 1357 1289, 1246, 1229, 1195, 1178, 1116, 1107, 1028, 902, 887, 837, 818, 805, 789, 701 cm<sup>-1</sup>. HRMS (ESI) calcd for C<sub>19</sub>H<sub>16</sub>NO<sub>3</sub> [M+H]<sup>+</sup>: 306.1125, found 306.1117.





**2-((8*R*,9*S*,13*S*,14*S*)-13-Methyl-17-oxo-7,8,9,11,12,13,14,15,16,17-decahydro-6*H*-cyclopenta[*a*]phenanthren-3-yl)propanenitrile (2v).** NiCl<sub>2</sub>·6H<sub>2</sub>O (5.9 mg, 0.025 mmol), Xantphos (17.4 mg, 0.03 mmol), Zinc powder (6.5 mg, 0.1 mmol), Zn(CN)<sub>2</sub> (35.2 mg, 0.3 mmol), (8*R*,9*S*,13*S*,14*S*)-13-methyl-3-vinyl-6,7,8,9,11,12,13,14,15,16-decahydro-17*H*-cyclopenta[*a*]phenanthren-17-one (140.2 mg, 0.5 mmol), dioxane (2.5 mL) and H<sub>2</sub>O (50 μL) were stirred at 80 °C for 4 h. Column chromatography on silica gel (eluent: petroleum ether/ethyl acetate = 3:1) afforded the product **2v** (dr = 1:1 determined by HPLC) in 95% yield (146.0 mg) as a colorless oil. <sup>1</sup>H NMR (400 M, CDCl<sub>3</sub>): δ 0.91 (s, 3H), 1.40-1.67 (m, 9H), 1.95-2.19 (m, 4H), 2.26-2.31 (m, 1H), 2.39-2.44 (m, 1H), 2.50 (dd, *J* = 18.6, 8.6 Hz, 1H), 2.91-2.95 (m, 2H), 3.84 (q, *J* = 7.2 Hz, 1H), 7.10-7.13 (m, 2H), 7.30 (d, *J* = 7.6 Hz, 1H). <sup>13</sup>C NMR (100 M, CDCl<sub>3</sub>): δ 13.62, 21.20, 21.23, 21.35, 25.46, 26.13, 29.12, 29.15, 30.50, 30.52, 31.33, 35.62, 37.78, 44.02, 47.71, 50.21, 121.57, 123.85, 125.94, 127.03, 134.29, 134.31, 137.26, 139.47, 220.51. IR (neat): 3369, 2927, 2859, 2239, 1732, 1498, 1454, 1404, 1373, 1243, 1086, 1050, 1008, 819 cm<sup>-1</sup>. HRMS (EI) calcd for C<sub>21</sub>H<sub>25</sub>NO [M]<sup>+</sup>: 307.1936, found 307.1943.



**(*E*)-2-Methyl-4-phenylbut-3-enenitrile (2w).** NiCl<sub>2</sub>·6H<sub>2</sub>O (5.9 mg, 0.025 mmol), Xantphos (17.4 mg, 0.03 mmol), Zinc powder (6.5 mg, 0.1 mmol), Zn(CN)<sub>2</sub> (35.2 mg, 0.3 mmol), dioxane (2.5 mL), (*E*)-buta-1,3-dien-1-ylbenzene (65.1 mg, 0.5 mmol) and H<sub>2</sub>O (50 μL) were stirred at 80 °C for 24 h. Column chromatography on silica gel (eluent: petroleum ether/ethyl acetate = 50:1) afforded the product **2w** in 80% yield (63.0 mg) as a colorless oil. <sup>1</sup>H NMR (400 M, CDCl<sub>3</sub>): δ 1.49 (d, *J* = 6.8 Hz, 3H), 3.45-3.52 (m, 1H), 6.06 (dd, *J* = 15.8, 6.4 Hz,

1H), 6.71 (d,  $J = 16.0$  Hz, 1H), 7.24-7.38 (m, 5H).  $^{13}\text{C}$  NMR (100 M,  $\text{CDCl}_3$ ):  $\delta$  18.95, 28.27, 120.81, 124.23, 126.45, 128.17, 128.63, 132.41, 135.60. The spectroscopic data are in agreement with that previously reported.<sup>5</sup>

#### Isolation of **4a'** at the early stage of the hydrocyanation of **4a**.



$\text{NiCl}_2 \cdot 6\text{H}_2\text{O}$  (5.9 mg, 0.025 mmol), Xantphos (17.4 mg, 0.03 mmol), Zinc powder (6.5 mg, 0.1 mmol),  $\text{Zn}(\text{CN})_2$  (35.2 mg, 0.3 mmol), dioxane (2.5 mL), 2-allylnaphthalene (84.1 mg, 0.5 mmol) and  $\text{H}_2\text{O}$  (50  $\mu\text{L}$ ) were stirred at 80  $^\circ\text{C}$  for 4 h. The mixture was filtered through a pad of silica gel and washed with ether. The solvent was evaporated under the reduced pressure and the residue was purified by column chromatography on silica gel (eluent: pentane) to give the product **4a'** ( $E/Z = 33.3:1$ ) in 94% yield (78.9 mg) as a colorless oil. For **E-4a'**:  $^1\text{H}$  NMR (400 M,  $\text{CDCl}_3$ ):  $\delta$  1.90 (dd,  $J = 6.8, 1.6$  Hz, 3H), 6.28-6.37 (m, 1H), 6.52 (d,  $J = 16.0$  Hz, 1H), 7.35-7.42 (m, 2H), 7.51-7.54 (m, 1H), 7.61 (s, 1H), 7.70-7.75 (m, 3H).  $^{13}\text{C}$  NMR (100 M,  $\text{CDCl}_3$ ):  $\delta$  18.60, 123.45, 125.16, 125.37, 126.05, 126.11, 127.58, 127.79, 128.01, 131.12, 132.58, 133.67, 135.33. The spectroscopic data are in agreement with that previously reported.<sup>11</sup> For partial  $^1\text{H}$  NMR of **Z-4a'**:  $^1\text{H}$  NMR (400 M,  $\text{CDCl}_3$ ):  $\delta$  1.95 (dd,  $J = 6.8, 1.6$  Hz, 3H), 5.81-5.89 (m, 1H). The spectroscopic data are in agreement with that previously reported.<sup>12</sup>



**2-(Naphthalen-2-yl)butanenitrile (5)**. This product was synthesized following the procedure described for Ni-catalyzed hydrocyanation of aryl alkenes.  $\text{NiCl}_2 \cdot 6\text{H}_2\text{O}$  (5.9 mg, 0.025 mmol), Xantphos (17.4 mg, 0.03 mmol), Zinc powder (6.5 mg, 0.1 mmol),  $\text{Zn}(\text{CN})_2$  (35.2 mg, 0.3

mmol), dioxane (2.5 mL), 2-allylnaphthalene (84.1 mg, 0.5 mmol) and H<sub>2</sub>O (50 μL) were stirred at 80 °C for 24 h. Column chromatography on silica gel (eluent: petroleum ether/ethyl acetate = 30:1) afforded the product **5** in 88% yield (85.9 mg) as a colorless oil. <sup>1</sup>H NMR (400 M, CDCl<sub>3</sub>): δ 1.07 (t, *J* = 7.2 Hz, 3H), 1.95-2.03 (m, 2H), 3.86 (t, *J* = 7.2 Hz, 1H), 7.36 (dd, *J* = 8.6, 1.6 Hz, 1H), 7.46-7.51 (m, 2H), 7.79-7.84 (m, 4H). <sup>13</sup>C NMR (100 M, CDCl<sub>3</sub>): δ 11.36, 28.93, 38.88, 120.67, 124.71, 126.24, 126.33, 126.57, 127.59, 127.73, 128.87, 132.66, 132.88, 133.14. IR (neat): 3055, 2970, 2932, 2875, 2236, 1600, 1508, 1458, 1370, 1268, 1124, 893, 857, 816, 786, 748 cm<sup>-1</sup>. HRMS (EI) calcd for C<sub>14</sub>H<sub>13</sub>N [M]<sup>+</sup>: 195.1048, found 195.1042.

### **Optimization studies for Ni-catalyzed hydrocyanation of aliphatic alkenes.**

#### **General procedure for optimization studies.**

The reaction was conducted in an oven-dried screw-cap vial (4 mL) equipped with a magnetic stir bar. In a nitrogen-filled glove box, Ni(ClO<sub>4</sub>)<sub>2</sub>·6H<sub>2</sub>O (5.5 mg, 0.015 mmol) [or other Ni(II) salts], dppp (7.4 mg, 0.018 mmol) [or other ligands], Zinc powder (19.6 mg, 0.3 mmol), Zn(CN)<sub>2</sub> (21.1 mg, 0.18 mmol), DMAP (36.7 mg, 0.3 mmol) [or other additives], acetonitrile (1.5 mL), 2-allylnaphthalene (50.5 mg, 0.3 mmol) were added sequentially to a screw-cap vial. The vial cap was then securely fitted and taken outside the glove box, then H<sub>2</sub>O (10.8 μL, 0.6 mmol) was added to the vial. After the reaction mixture was stirred at 80 °C for 24 h, the mixture was filtered through a pad of silica gel and washed with ethyl acetate. The solvent was evaporated under the reduced pressure and the residue was dissolved in CDCl<sub>3</sub>. The NMR yields were obtained by <sup>1</sup>H NMR analysis of the crude mixture using mesitylene (36.1 mg, 0.3 mmol) as an internal standard.

**Table S2.** Optimization studies for Ni-catalyzed hydrocyanation of aliphatic alkenes.

| entry            | catalyst                                              | ligand      | reductant (%) | additive                    | 4a (%) <sup>a</sup> | yield (%) <sup>a</sup> |    |    |                  |
|------------------|-------------------------------------------------------|-------------|---------------|-----------------------------|---------------------|------------------------|----|----|------------------|
|                  |                                                       |             |               |                             |                     | 5                      | 7a | 6a | 4a' <sup>b</sup> |
| 1                | NiCl <sub>2</sub> ·6H <sub>2</sub> O                  | dppf        | Zn (20)       | -                           | 0                   | 66                     | 2  | 5  | 22               |
| 2                | NiCl <sub>2</sub> ·6H <sub>2</sub> O                  | dppf        | Zn (20)       | DMAP                        | 0                   | 9                      | 2  | 4  | 67 (33:1)        |
| 3                | NiCl <sub>2</sub> ·6H <sub>2</sub> O                  | dppp        | Zn (20)       | DMAP                        | 0                   | 2                      | 10 | 76 | 11               |
| 4                | NiCl <sub>2</sub> ·6H <sub>2</sub> O                  | Xantphos    | Zn (20)       | DMAP                        | 0                   | 17                     | 1  | 23 | 53 (52:1)        |
| 5                | NiCl <sub>2</sub> ·6H <sub>2</sub> O                  | neocuproine | Zn (20)       | DMAP                        | 20                  | 0                      | 2  | 22 | 56 (18:1)        |
| 6                | NiCl <sub>2</sub> ·6H <sub>2</sub> O                  | dppp        | Zn (20)       | 4-NH <sub>2</sub> -pyridine | 13                  | 1                      | 9  | 64 | 13               |
| 7                | NiCl <sub>2</sub> ·6H <sub>2</sub> O                  | dppp        | Zn (20)       | TBAI                        | 0                   | 20                     | 0  | 10 | 69 (22:1)        |
| 8                | NiCl <sub>2</sub> ·6H <sub>2</sub> O                  | dppp        | Zn (20)       | TMEDA                       | 47                  | 1                      | 1  | 26 | 25 (24:1)        |
| 9                | Ni(ClO <sub>4</sub> ) <sub>2</sub> ·6H <sub>2</sub> O | dppp        | Zn (20)       | DMAP                        | 16                  | 0                      | 7  | 65 | 9                |
| 10               | NiSO <sub>4</sub>                                     | dppp        | Zn (20)       | DMAP                        | 50                  | 0                      | 6  | 38 | 6                |
| 11               | Ni(OTf) <sub>2</sub>                                  | dppp        | Zn (20)       | DMAP                        | 49                  | 0                      | 5  | 40 | 6                |
| 12 <sup>c</sup>  | Ni(ClO <sub>4</sub> ) <sub>2</sub> ·6H <sub>2</sub> O | dppp        | Zn (100)      | DMAP                        | 0                   | 5                      | 10 | 80 | 0                |
| 13 <sup>cd</sup> | Ni(ClO <sub>4</sub> ) <sub>2</sub> ·6H <sub>2</sub> O | dppp        | Zn (100)      | DMAP                        | 0                   | 5                      | 11 | 77 | 1                |
| 14 <sup>c</sup>  | Ni(ClO <sub>4</sub> ) <sub>2</sub> ·6H <sub>2</sub> O | -           | Zn (100)      | DMAP                        | 0                   | 2                      | 3  | 33 | 61 (30:1)        |
| 15 <sup>c</sup>  | Ni(ClO <sub>4</sub> ) <sub>2</sub> ·6H <sub>2</sub> O | dppp        | Zn (100)      | -                           | 0                   | 89                     | 0  | 3  | 4                |
| 16 <sup>ce</sup> | Ni(ClO <sub>4</sub> ) <sub>2</sub> ·6H <sub>2</sub> O | dppp        | Zn (100)      | DMAP                        | 24                  | 0                      | 7  | 56 | 10               |
| 15 <sup>c</sup>  | NiCl <sub>2</sub> (dppp)                              | -           | Zn (100)      | DMAP                        | 0                   | 4                      | 12 | 71 | 12               |
| 16 <sup>ce</sup> | NiCl <sub>2</sub> (dppp)                              | -           | Zn (100)      | DMAP                        | 80                  | 0                      | 2  | 12 | 6                |

<sup>a</sup>Determined by <sup>1</sup>H NMR of the crude reaction mixture using mesitylene as an internal standard. <sup>b</sup>Overall yields of the *E*- and *Z*-isomers of **4a'** and the ratio of *E/Z* isomers are shown in parentheses if *Z*-isomers exist. <sup>c</sup>24 h. <sup>d</sup>10 mol% Ni(ClO<sub>4</sub>)<sub>2</sub>·6H<sub>2</sub>O and 12 mol% dppp were used. <sup>e</sup>Without H<sub>2</sub>O.

### Synthesis of 6a-6m and 7a-7m.

#### Typical procedure for the synthesis of 6a and 7a.



The reaction was conducted in an oven-dried screw-cap vial (8 mL) equipped with a magnetic stir bar. The vial containing Ni(ClO<sub>4</sub>)<sub>2</sub>·6H<sub>2</sub>O was equipped with a septum cap, which was pierced by a needle and introduced into the antechamber of nitrogen-filled glovebox. Before transferring into the inside of the glovebox, it was evacuated and back-filled with nitrogen for three times (ca. 5 min). In a nitrogen-filled glove box, Ni(ClO<sub>4</sub>)<sub>2</sub>·6H<sub>2</sub>O (9.1 mg, 0.025 mmol), dppp (12.4 mg, 0.03 mmol), Zinc powder (32.7 mg, 0.5 mmol), Zn(CN)<sub>2</sub> (35.2 mg, 0.3 mmol), DMAP (61.1 mg, 0.5 mmol), acetonitrile (2.5 mL), 2-allylnaphthalene (84.1 mg, 0.5 mmol) were added sequentially to a screw-cap vial. The vial cap was then securely fitted and taken outside the glove box, then H<sub>2</sub>O (18 μL, 1 mmol) was added to the vial. After the reaction mixture was stirred at 80 °C for 24 h, the mixture was filtered through a pad of silica gel and washed with ethyl acetate. The solvent was evaporated under the reduced pressure and the residue was purified by preparative TLC on silica gel (eluent: petroleum ether/ethyl acetate = 30:1) to give the desired product **6a** in 78% yield (76.2 mg) as a white solid and **7a** in 9% yield (8.8 mg) as a white solid.



**4-(Naphthalen-2-yl)butanenitrile (6a).** <sup>1</sup>H NMR (400 M, CDCl<sub>3</sub>): δ 1.94-2.01 (m, 2H), 2.23 (t, *J* = 7.2 Hz, 2H), 2.86 (t, *J* = 7.2 Hz, 2H), 7.25 (dd, *J* = 8.2, 1.6 Hz, 1H), 7.39-7.46 (m, 2H), 7.58 (s, 1H), 7.75-7.79 (m, 3H). <sup>13</sup>C NMR (100 M, CDCl<sub>3</sub>): δ 16.22, 26.60, 34.31, 119.47, 125.45, 126.09, 126.69, 127.35, 127.53, 128.25, 132.07, 133.38, 137.03. The spectroscopic data are in agreement with that previously reported.<sup>13</sup>

**2-Methyl-3-(naphthalen-2-yl)propanenitrile (7a).** <sup>1</sup>H NMR (400 M, CDCl<sub>3</sub>): δ 1.36 (d, *J* =

6.8 Hz, 3H), 2.92-3.01 (m, 2H), 3.09-3.14 (m, 1H), 7.34 (dd,  $J = 8.6, 1.6$  Hz, 1H), 7.46-7.49 (m, 2H), 7.69 (s, 1H), 7.80-7.83 (m, 3H).  $^{13}\text{C}$  NMR (100 M,  $\text{CDCl}_3$ ):  $\delta$  17.62, 27.42, 40.11, 122.54, 125.88, 126.27, 126.93, 127.65, 127.84, 128.46, 132.52, 133.40, 134.27. The spectroscopic data are in agreement with that previously reported.<sup>14</sup>



$\text{Ni}(\text{ClO}_4)_2 \cdot 6\text{H}_2\text{O}$  (9.1 mg, 0.025 mmol), dppp (12.4 mg, 0.03 mmol), Zinc powder (32.7 mg, 0.5 mmol),  $\text{Zn}(\text{CN})_2$  (35.2 mg, 0.3 mmol), DMAP (61.1 mg, 0.5 mmol), acetonitrile (2.5 mL), 1-allyl-4-methoxybenzene (74.1 mg, 0.5 mmol) and  $\text{H}_2\text{O}$  (18  $\mu\text{L}$ , 1 mmol) were stirred at 80  $^\circ\text{C}$  for 24 h. Column chromatography on silica gel (eluent: petroleum ether/ethyl acetate = 20:1) to give the desired product **6b** and **7b** in 81% overall yield (70.6 mg) as a colorless oil (**6b:7b** = 8.3:1).

**4-(4-Methoxyphenyl)butanenitrile (6b)**.  $^1\text{H}$  NMR (400 M,  $\text{CDCl}_3$ ):  $\delta$  1.89-1.96 (m, 2H), 2.28 (t,  $J = 7.2$  Hz, 2H), 2.70 (t,  $J = 7.2$  Hz, 2H), 3.78 (s, 3H), 6.84 (d,  $J = 8.4$  Hz, 2H), 7.09 (d,  $J = 8.4$  Hz, 2H).  $^{13}\text{C}$  NMR (100 M,  $\text{CDCl}_3$ ):  $\delta$  16.10, 26.95, 33.29, 55.09, 113.89, 119.47, 129.25, 131.58, 158.08. The spectroscopic data are in agreement with that previously reported.<sup>15</sup>

**3-(4-Methoxyphenyl)-2-methylpropanenitrile (7b)**. Partial  $^1\text{H}$  NMR (400 M,  $\text{CDCl}_3$ ):  $\delta$  1.30 (d,  $J = 6.4$  Hz, 3H), 2.77-2.87 (m, 3H), 3.78 (s, 3H), 7.14 (d,  $J = 8.8$  Hz, 2H), partial  $^{13}\text{C}$  NMR (400 M,  $\text{CDCl}_3$ ):  $\delta$  17.34, 27.61, 38.96, 113.90, 129.95. The spectroscopic data are in agreement with that previously reported.<sup>14</sup>



$\text{Ni}(\text{ClO}_4)_2 \cdot 6\text{H}_2\text{O}$  (9.1 mg, 0.025 mmol), dppp (12.4 mg, 0.03 mmol), Zinc powder (32.7 mg, 0.5 mmol),  $\text{Zn}(\text{CN})_2$  (35.2 mg, 0.3 mmol), DMAP (61.1 mg, 0.5 mmol), acetonitrile (2.5 mL), but-3-en-1-ylbenzene (66.1 mg, 0.5 mmol) and  $\text{H}_2\text{O}$  (18  $\mu\text{L}$ , 1 mmol) were stirred at 80  $^\circ\text{C}$  for

24 h. Column chromatography on silica gel (eluent: petroleum ether/ethyl acetate = 30:1 to 20:1) to give the desired product **6c** in 81% yield (64.3 mg) as a colorless oil and **7c** in 12% yield (9.2 mg) as a colorless oil.

**5-Phenylpentanenitrile (6c).**  $^1\text{H}$  NMR (400 M,  $\text{CDCl}_3$ ):  $\delta$  1.62-1.69 (m, 2H), 1.73-1.81 (m, 2H), 2.31 (t,  $J = 7.2$  Hz, 2H), 2.64 (t,  $J = 7.2$  Hz, 2H), 7.15-7.21 (m, 3H), 7.26-7.30 (m, 2H).  $^{13}\text{C}$  NMR (100 M,  $\text{CDCl}_3$ ):  $\delta$  16.92, 24.71, 30.14, 34.85, 119.54, 125.95, 128.24, 128.35, 141.12. The spectroscopic data are in agreement with that previously reported.<sup>16</sup>

**2-Methyl-4-phenylbutanenitrile (7c).**  $^1\text{H}$  NMR (400 M,  $\text{CDCl}_3$ ):  $\delta$  1.33 (d,  $J = 7.2$  Hz, 3H), 1.79-1.88 (m, 1H), 1.91-2.01 (m, 1H), 2.53-2.62 (m, 1H), 2.71-2.79 (m, 1H), 2.84-2.91 (m, 1H), 7.19-7.26 (m, 3H), 7.29-7.33 (m, 2H).  $^{13}\text{C}$  NMR (100 M,  $\text{CDCl}_3$ ):  $\delta$  17.97, 24.81, 33.15, 35.71, 122.74, 126.38, 128.38, 128.61, 140.11. The spectroscopic data are in agreement with that previously reported.<sup>2</sup>



$\text{Ni}(\text{ClO}_4)_2 \cdot 6\text{H}_2\text{O}$  (9.1 mg, 0.025 mmol), dppp (12.4 mg, 0.03 mmol), Zinc powder (32.7 mg, 0.5 mmol),  $\text{Zn}(\text{CN})_2$  (35.2 mg, 0.3 mmol), DMAP (61.1 mg, 0.5 mmol), acetonitrile (2.5 mL), dec-1-ene (70.1 mg, 0.5 mmol) and  $\text{H}_2\text{O}$  (18  $\mu\text{L}$ , 1 mmol) were stirred at 80  $^\circ\text{C}$  for 24 h. Column chromatography on silica gel (eluent: petroleum ether/ethyl acetate = 30:1) to give the desired product **6d** and **7d** in 77% overall yield (64.7 mg) as a colorless oil (**6d:7d** = 12.5:1).

**Undecanenitrile (6d).**  $^1\text{H}$  NMR (400 M,  $\text{CDCl}_3$ ):  $\delta$  0.88 (t,  $J = 6.8$  Hz, 3H), 1.20-1.32 (m, 12H), 1.41-1.46 (m, 2H), 1.62-1.69 (m, 2H), 2.33 (t,  $J = 7.2$  Hz, 2H).  $^{13}\text{C}$  NMR (100 M,  $\text{CDCl}_3$ ):  $\delta$  13.96, 16.98, 22.54, 25.26, 28.54, 28.64, 29.13, 29.19, 29.34, 31.73, 119.73. The spectroscopic data are in agreement with that previously reported.<sup>17</sup>

**2-Methyldecanenitrile (7d).** Partial  $^1\text{H}$  NMR (400 M,  $\text{CDCl}_3$ ):  $\delta$  0.88 (t,  $J = 6.8$  Hz, 3H), 2.55-2.64 (m, 1H), partial  $^{13}\text{C}$  NMR (400 M,  $\text{CDCl}_3$ ):  $\delta$  17.90, 25.38, 26.91, 28.95, 29.05, 29.20, 31.69, 33.95. The  $^1\text{H}$  NMR spectroscopic data are in agreement with that previously reported.<sup>18</sup>



**3-Cyclohexylpropanenitrile (6e).** Ni(ClO<sub>4</sub>)<sub>2</sub>·6H<sub>2</sub>O (9.1 mg, 0.025 mmol), dppp (12.4 mg, 0.03 mmol), Zinc powder (32.7 mg, 0.5 mmol), Zn(CN)<sub>2</sub> (35.2 mg, 0.3 mmol), DMAP (61.1 mg, 0.5 mmol), acetonitrile (2.5 mL), vinylcyclohexane (55.1 mg, 0.5 mmol) and H<sub>2</sub>O (18 μL, 1 mmol) were stirred at 80 °C for 24 h. Column chromatography on silica gel (eluent: petroleum ether/ethyl acetate = 30:1) to give the desired product **6e** in 80% yield (55.0 mg) as a colorless oil. <sup>1</sup>H NMR (400 M, CDCl<sub>3</sub>): δ 0.87-0.95 (m, 2H), 1.09-1.30 (m, 3H), 1.35-1.44 (m, 1H), 1.55 (q, *J* = 7.2 Hz, 2H), 1.65-1.74 (m, 5H), 2.35 (t, *J* = 7.2 Hz, 2H). <sup>13</sup>C NMR (100 M, CDCl<sub>3</sub>): δ 14.49, 25.81, 26.17, 32.36, 32.42, 36.43, 119.96. The spectroscopic data are in agreement with that previously reported.<sup>19</sup>



Ni(ClO<sub>4</sub>)<sub>2</sub>·6H<sub>2</sub>O (9.1 mg, 0.025 mmol), dppp (12.4 mg, 0.03 mmol), Zinc powder (32.7 mg, 0.5 mmol), Zn(CN)<sub>2</sub> (35.2 mg, 0.3 mmol), DMAP (61.1 mg, 0.5 mmol), acetonitrile (2.5 mL), 2-allylisindoline-1,3-dione (93.6 mg, 0.5 mmol) and H<sub>2</sub>O (18 μL, 1 mmol) were stirred at 80 °C for 24 h. Purification by preparative TLC on silica gel (eluent: petroleum ether/ethyl acetate = 5:1) to give the desired product **6f** in 78% yield (83.5 mg) as a colorless oil and **7f** in 17% yield (18.2 mg) as a white solid.

**4-(1,3-Dioxoisindolin-2-yl)butanenitrile (6f).** <sup>1</sup>H NMR (400 M, CDCl<sub>3</sub>): δ 2.05-2.12 (m, 2H), 2.45 (t, *J* = 7.2 Hz, 2H), 3.82 (t, *J* = 6.4 Hz, 2H), 7.73-7.77 (m, 2H), 7.84-7.88 (m, 2H). <sup>13</sup>C NMR (100 M, CDCl<sub>3</sub>): δ 14.95, 24.60, 36.50, 118.70, 123.30, 131.70, 134.11, 168.10. The spectroscopic data are in agreement with that previously reported.<sup>20</sup>

**3-(1,3-Dioxoisindolin-2-yl)-2-methylpropanenitrile (7f).** <sup>1</sup>H NMR (400 M, CDCl<sub>3</sub>): δ 1.40 (d, *J* = 6.8 Hz, 3H), 3.19-3.28 (m, 1H), 3.77 (dd, *J* = 13.8, 6.8 Hz, 1H), 4.02 (dd, *J* = 13.6, 8.4 Hz, 1H), 7.76-7.79 (m, 2H), 7.87-7.91 (m, 2H). <sup>13</sup>C NMR (100 M, CDCl<sub>3</sub>): δ 15.54, 25.23,



40.09, 120.37, 123.68, 131.59, 134.40, 167.69. The spectroscopic data are in agreement with that previously reported.<sup>21</sup>



**4-(Phenylamino)butanenitrile (6g).** Ni(ClO<sub>4</sub>)<sub>2</sub>·6H<sub>2</sub>O (9.1 mg, 0.025 mmol), dppp (12.4 mg, 0.03 mmol), Zinc powder (32.7 mg, 0.5 mmol), Zn(CN)<sub>2</sub> (35.2 mg, 0.3 mmol), DMAP (61.1 mg, 0.5 mmol), acetonitrile (2.5 mL), *N*-allylaniline (66.6 mg, 0.5 mmol) and H<sub>2</sub>O (18 μL, 1 mmol) were stirred at 80 °C for 24 h. Column chromatography on silica gel (eluent: petroleum ether/ethyl acetate = 10:1 to 5:1) to give the product **6g** in 81% yield (64.9 mg) as a light yellow oil. <sup>1</sup>H NMR (400 M, CDCl<sub>3</sub>): δ 1.88-1.95 (m, 2H), 2.42 (t, *J* = 6.8 Hz, 2H), 3.26 (t, *J* = 6.8 Hz, 2H), 3.73 (s, 1H), 6.60 (d, *J* = 8.0 Hz, 2H), 6.72 (t, *J* = 7.6 Hz, 1H), 7.18 (t, *J* = 8.0 Hz, 2H). <sup>13</sup>C NMR (100 M, CDCl<sub>3</sub>): δ 14.61, 25.00, 42.07, 112.65, 117.65, 119.39, 129.24, 147.43. The spectroscopic data are in agreement with that previously reported.<sup>22</sup>



**4-((*tert*-Butyldimethylsilyl)oxy)-6-phenylhexanenitrile (6h).** Ni(ClO<sub>4</sub>)<sub>2</sub>·6H<sub>2</sub>O (9.1 mg, 0.025 mmol), dppp (12.4 mg, 0.03 mmol), Zinc powder (32.7 mg, 0.5 mmol), Zn(CN)<sub>2</sub> (35.2 mg, 0.3 mmol), DMAP (61.1 mg, 0.5 mmol), acetonitrile (2.5 mL), *tert*-butyldimethyl((5-phenylpent-1-en-3-yl)oxy)silane (138.3 mg, 0.5 mmol) and H<sub>2</sub>O (18 μL, 1 mmol) were stirred at 80 °C for 24 h. Column chromatography on silica gel (eluent: petroleum ether/ethyl acetate = 50:1) to give the desired product **6h** in 80% yield (120.7 mg) as a colorless oil. <sup>1</sup>H NMR (400 M, CDCl<sub>3</sub>): δ 0.12 (d, *J* = 2.0 Hz, 6H), 0.95 (s, 9H), 1.77-1.94 (m, 4H), 2.43 (t, *J* = 7.2 Hz, 2H), 2.66 (t, *J* = 8.4 Hz, 2H), 3.85-3.90 (m, 1H), 7.19-7.24 (m, 3H), 7.30-7.34 (m, 2H). <sup>13</sup>C NMR (100 M, CDCl<sub>3</sub>): δ -4.74, -4.44, 12.97, 17.92, 25.73, 31.19, 32.10, 38.52, 69.70, 119.85, 125.86, 128.15, 128.39, 141.64. IR (neat): 3084, 3060, 3026, 2952, 2929, 2857, 2246, 1603, 1495, 1469, 1453, 1362, 1254, 1092, 993, 834, 774, 746, 698, 663 cm<sup>-1</sup>. HRMS (EI) calcd for C<sub>18</sub>H<sub>29</sub>NOSi [M]<sup>+</sup>: 303.2018, found 303.2010.



Column chromatography on silica gel (eluent: petroleum ether/ethyl acetate =3:2) to give the desired product **6j** and **7j** in 89% overall yield (50.4 mg) as a colorless oil (**6j**:**7j** = 9.1:1).

**6-Hydroxyhexanenitrile (6j)**.  $^1\text{H}$  NMR (400 M,  $\text{CDCl}_3$ ):  $\delta$  1.49-1.64 (m, 4H), 1.67-1.74 (m, 2H), 2.27 (s, 1H), 2.38 (t,  $J = 7.2$  Hz, 2H), 3.64 (t,  $J = 6.4$  Hz, 2H).  $^{13}\text{C}$  NMR (100 M,  $\text{CDCl}_3$ ):  $\delta$  16.98, 24.85, 25.01, 31.53, 61.98, 119.68. The spectroscopic data are in agreement with that previously reported.<sup>23</sup>

**5-Hydroxy-2-methylpentanenitrile (7j)**. Partial  $^1\text{H}$  NMR (400 M,  $\text{CDCl}_3$ ):  $\delta$  1.34 (d,  $J = 7.2$  Hz, 3H), 2.64-2.73 (m, 1H), partial  $^{13}\text{C}$  NMR (100 M,  $\text{CDCl}_3$ ):  $\delta$  17.87, 25.24, 29.77, 30.38, 61.54.



**Ethyl 5-cyanopentanoate (6k)**.  $\text{Ni}(\text{ClO}_4)_2 \cdot 6\text{H}_2\text{O}$  (9.1 mg, 0.025 mmol), dppp (12.4 mg, 0.03 mmol), Zinc powder (32.7 mg, 0.5 mmol),  $\text{Zn}(\text{CN})_2$  (35.2 mg, 0.3 mmol), DMAP (61.1 mg, 0.5 mmol), acetonitrile (2.5 mL), ethyl pent-4-enoate (64.1 mg, 0.5 mmol) and  $\text{H}_2\text{O}$  (18  $\mu\text{L}$ , 1 mmol) were stirred at 80  $^\circ\text{C}$  for 24 h. Column chromatography on silica gel (eluent: petroleum ether/ethyl acetate = 10:1 to 3:1) to give the desired product **6k** in 74% yield (57.5 mg) as a colorless oil.  $^1\text{H}$  NMR (400 M,  $\text{CDCl}_3$ ):  $\delta$  1.26 (t,  $J = 7.2$  Hz, 3H), 1.68-1.82 (m, 4H), 2.34-2.41 (m, 4H), 4.14 (q,  $J = 7.2$  Hz, 2H).  $^{13}\text{C}$  NMR (100 M,  $\text{CDCl}_3$ ):  $\delta$  14.00, 16.74, 23.69, 24.61, 33.09, 60.28, 119.21, 172.58. The spectroscopic data are in agreement with that previously reported.<sup>17</sup>



**4-(2-Oxocyclohexyl)butanenitrile (6l)**.  $\text{Ni}(\text{ClO}_4)_2 \cdot 6\text{H}_2\text{O}$  (9.1 mg, 0.025 mmol), dppp (12.4 mg, 0.03 mmol), Zinc powder (32.7 mg, 0.5 mmol),  $\text{Zn}(\text{CN})_2$  (35.2 mg, 0.3 mmol), DMAP (61.1 mg, 0.5 mmol), acetonitrile (2.5 mL), 2-allylcyclohexan-1-one (69.1 mg, 0.5 mmol) and  $\text{H}_2\text{O}$  (18  $\mu\text{L}$ , 1 mmol) were stirred at 80  $^\circ\text{C}$  for 24 h. Column chromatography on silica gel

(eluent: petroleum ether/ethyl acetate = 10:1 to 5:1) to give the desired product **6l** in 68% yield (56.4 mg) as a colorless oil.  $^1\text{H}$  NMR (400 M,  $\text{CDCl}_3$ ):  $\delta$  1.32-1.46 (m, 2H), 1.58-1.78 (m, 4H), 1.82-1.92 (m, 2H), 2.05-2.14 (m, 2H), 2.28-2.42 (m, 5H).  $^{13}\text{C}$  NMR (100 M,  $\text{CDCl}_3$ ):  $\delta$  17.17, 23.08, 24.81, 27.77, 28.60, 33.97, 41.90, 49.75, 119.50, 212.26. The spectroscopic data are in agreement with that previously reported.<sup>24</sup>



**12-Oxododecanenitrile (6m).**  $\text{Ni}(\text{ClO}_4)_2 \cdot 6\text{H}_2\text{O}$  (9.1 mg, 0.025 mmol), dppp (12.4 mg, 0.03 mmol), Zinc powder (32.7 mg, 0.5 mmol),  $\text{Zn}(\text{CN})_2$  (35.2 mg, 0.3 mmol), DMAP (61.1 mg, 0.5 mmol), acetonitrile (2.5 mL), undec-10-enal (84.1 mg, 0.5 mmol) and  $\text{H}_2\text{O}$  (18  $\mu\text{L}$ , 1 mmol) were stirred at 80  $^\circ\text{C}$  for 24 h. Column chromatography on silica gel (eluent: petroleum ether/ethyl acetate = 10:1) to give the desired product **6m** in 58% yield (57.1 mg) as a colorless oil.  $^1\text{H}$  NMR (400 M,  $\text{CDCl}_3$ ):  $\delta$  1.26-1.30 (m, 10H), 1.39-1.46 (m, 2H), 1.59-1.69 (m, 4H), 2.34 (t,  $J = 7.2$  Hz, 2H), 2.41-2.45 (m, 2H), 9.76 (s, 1H).  $^{13}\text{C}$  NMR (100 M,  $\text{CDCl}_3$ ):  $\delta$  16.96, 21.88, 25.20, 28.47, 28.56, 28.95, 29.05, 29.09, 29.11, 43.73, 119.74, 202.80. The spectroscopic data are in agreement with that previously reported.<sup>25</sup>

### Synthesis of 6n-6s.

#### Typical procedure for the synthesis of 6n.



The reaction was conducted in an oven-dried screw-cap vial (8 mL) equipped with a magnetic stir bar. In a nitrogen-filled glove box,  $\text{NiCl}_2 \cdot 6\text{H}_2\text{O}$  (5.9 mg, 0.025 mmol), dppf (16.6 mg, 0.03 mmol), Zinc powder (6.5 mg, 0.1 mmol),  $\text{Zn}(\text{CN})_2$  (35.2 mg, 0.3 mmol), acetonitrile (2.5 mL), diethyl allylphosphonate (89.1 mg, 0.5 mmol) were added sequentially

to a screw-cap vial. The vial cap was then securely fitted and taken outside the glove box, then H<sub>2</sub>O (18 μL, 1 mmol) was added to the vial. After the reaction mixture was stirred at 80 °C for 12 h, the mixture was filtered through a pad of silica gel and washed with ethyl acetate. The solvent was evaporated under the reduced pressure and the residue was purified by column chromatography on silica gel (eluent: ethyl acetate) to give the desired product **6n** in 85% yield (86.9 mg) as a colorless oil.



**Diethyl (3-cyanopropyl)phosphonate (6n).** <sup>1</sup>H NMR (400 M, CDCl<sub>3</sub>): δ 1.34 (t, *J* = 7.2 Hz, 6H), 1.85-2.03 (m, 4H), 2.52 (t, *J* = 6.8 Hz, 2H), 4.07-4.17 (m, 4H). <sup>13</sup>C NMR (100 M, CDCl<sub>3</sub>): δ 16.17 (d, <sup>3</sup>*J*<sub>C-P</sub> = 5.7 Hz), 17.46 (d, <sup>2</sup>*J*<sub>C-P</sub> = 15.4 Hz), 18.90 (d, <sup>3</sup>*J*<sub>C-P</sub> = 4.5 Hz), 24.20 (d, <sup>1</sup>*J*<sub>C-P</sub> = 142.6 Hz), 61.59 (d, <sup>2</sup>*J*<sub>C-P</sub> = 6.1 Hz), 118.63. <sup>31</sup>P NMR (162 M, CDCl<sub>3</sub>): δ 29.28. IR (neat): 3458, 2979, 2927, 2909, 2244, 1233, 1163, 1024, 957, 784, 733 cm<sup>-1</sup>. HRMS (ESI) calcd for C<sub>8</sub>H<sub>20</sub>N<sub>2</sub>O<sub>3</sub>P [M+NH<sub>4</sub>]<sup>+</sup>: 223.1206, found 223.1201.



**3-(2-Oxopyrrolidin-1-yl)propanenitrile (6o).** NiCl<sub>2</sub>·6H<sub>2</sub>O (5.9 mg, 0.025 mmol), dppf (16.6 mg, 0.03 mmol), Zinc powder (6.5 mg, 0.1 mmol), Zn(CN)<sub>2</sub> (35.2 mg, 0.3 mmol), acetonitrile (2.5 mL), 1-vinylpyrrolidin-2-one (55.6 mg, 0.5 mmol) and H<sub>2</sub>O (18 μL, 1 mmol) were stirred at 80 °C for 12 h. Column chromatography on silica gel (eluent: ethyl acetate) to give the desired product **6o** in 80% yield (55.4 mg) as a colorless oil. <sup>1</sup>H NMR (400 M, CDCl<sub>3</sub>): δ 2.06-2.14 (m, 2H), 2.41 (t, *J* = 8.0 Hz, 2H), 2.64 (t, *J* = 6.4 Hz, 2H), 3.55-3.59 (m, 4H). <sup>13</sup>C NMR (100 M, CDCl<sub>3</sub>): δ 16.39, 17.98, 30.43, 38.82, 47.87, 117.96, 175.44. The spectroscopic data are in agreement with that previously reported.<sup>26</sup>



**6p**

**3-(9H-Carbazol-9-yl)propanenitrile (6p).** NiCl<sub>2</sub>·6H<sub>2</sub>O (5.9 mg, 0.025 mmol), dppf (16.6 mg, 0.03 mmol), Zinc powder (6.5 mg, 0.1 mmol), Zn(CN)<sub>2</sub> (35.2 mg, 0.3 mmol), 9-vinyl-9H-carbazole (96.6 mg, 0.5 mmol), acetonitrile (2.5 mL) and H<sub>2</sub>O (18 μL, 1 mmol) were stirred at 80 °C for 12 h. Column chromatography on silica gel (eluent: petroleum ether/ethyl acetate = 5:1) afforded the product **6p** in 97% yield (106.8 mg) as a white solid. M.p.: 149.0-150.2 °C. <sup>1</sup>H NMR (400 M, CDCl<sub>3</sub>): δ 2.62 (t, *J* = 7.2 Hz, 2H), 4.41 (t, *J* = 7.2 Hz, 2H), 7.20-7.28 (m, 4H), 7.41 (t, *J* = 7.6 Hz, 2H), 8.03 (d, *J* = 7.6 Hz, 2H). <sup>13</sup>C NMR (100 M, CDCl<sub>3</sub>): δ 17.02, 38.54, 108.09, 117.35, 119.75, 120.50, 123.09, 125.99, 139.34. IR (neat): 3045, 2956, 2930, 2244, 1593, 1485, 1459, 1419, 1383, 1353, 1333, 1327, 1261, 1225, 1198, 1152, 1123, 1066, 744, 724 cm<sup>-1</sup>. HRMS (EI) calcd for C<sub>15</sub>H<sub>12</sub>N<sub>2</sub> [M]<sup>+</sup>: 220.1000, found 220.1005.



**6q**

**2-Cyanoethyl pivalate (6q).** NiCl<sub>2</sub>·6H<sub>2</sub>O (5.9 mg, 0.025 mmol), dppf (16.6 mg, 0.03 mmol), Zinc powder (6.5 mg, 0.1 mmol), Zn(CN)<sub>2</sub> (35.2 mg, 0.3 mmol), acetonitrile (2.5 mL), vinyl pivalate (64.1 mg, 0.5 mmol) and H<sub>2</sub>O (18 μL, 1 mmol) were stirred at 80 °C for 12 h. Column chromatography on silica gel (eluent: petroleum ether/ethyl acetate = 10:1) afforded the product **6q** in 53% yield (41.1mg) as a colorless oil. <sup>1</sup>H NMR (400 M, CDCl<sub>3</sub>): δ 1.24 (s, 9H), 2.72 (t, *J* = 6.4 Hz, 2H), 4.27 (t, *J* = 6.4 Hz, 2H). <sup>13</sup>C NMR (100 M, CDCl<sub>3</sub>): δ 17.89, 26.95, 38.69, 58.43, 116.68, 177.91. The spectroscopic data are in agreement with that previously reported.<sup>27</sup>



NiCl<sub>2</sub>·6H<sub>2</sub>O (5.9 mg, 0.025 mmol), dppf (16.6 mg, 0.03 mmol), Zinc powder (6.5 mg, 0.1 mmol), Zn(CN)<sub>2</sub> (35.2 mg, 0.3 mmol), acetonitrile (2.5 mL), dimethyl(phenyl)(vinyl)silane (81.2 mg, 0.5 mmol) and H<sub>2</sub>O (18 μL, 1 mmol) were stirred at 80 °C for 12 h. Column chromatography on silica gel (eluent: petroleum ether/ethyl acetate = 30:1) afforded the product **6r** and **7r** in 86% overall yield (81.3 mg) as a colorless oil (**6r**:**7r** = 16.7:1).

**3-(Dimethyl(phenyl)silyl)propanenitrile (6r)**. <sup>1</sup>H NMR (400 M, CDCl<sub>3</sub>): δ 0.34 (s, 6H), 1.11-1.15 (m, 2H), 2.22-2.26 (m, 2H), 7.35-7.38 (m, 3H), 7.47-7.49 (m, 2H). <sup>13</sup>C NMR (100 M, CDCl<sub>3</sub>): δ -3.67, 11.77, 11.95, 121.02, 127.95, 129.41, 133.34, 136.46. The spectroscopic data are in agreement with that previously reported.<sup>28</sup>

**2-(Dimethyl(phenyl)silyl)propanenitrile (7r)**. Partial <sup>1</sup>H NMR (400 M, CDCl<sub>3</sub>): δ 0.48 (d, *J* = 0.8 Hz, 6H), 1.22 (d, *J* = 7.2 Hz, 3H), 1.98 (q, *J* = 7.2 Hz, 1H), 7.54-7.57 (m, 2H). Partial <sup>13</sup>C NMR (100 M, CDCl<sub>3</sub>): δ -5.69, -5.09, 11.43, 11.86, 128.02, 130.04, 133.76. The <sup>1</sup>H NMR spectroscopic data are in agreement with that previously reported.<sup>29</sup>



**3-(Phenylsulfonyl)propanenitrile (6s)**. NiCl<sub>2</sub>·6H<sub>2</sub>O (5.9 mg, 0.025 mmol), dppf (16.6 mg, 0.03 mmol), Zinc powder (6.5 mg, 0.1 mmol), Zn(CN)<sub>2</sub> (35.2 mg, 0.3 mmol), (vinylsulfonyl)benzene (84.1 mg, 0.5 mmol), acetonitrile (2.5 mL) and H<sub>2</sub>O (18 μL, 1 mmol) were stirred at 80 °C for 12 h. Column chromatography on silica gel (eluent: petroleum ether/ethyl acetate = 2:1) afforded the product **6s** in 86% yield (84.0 mg) as a white solid. <sup>1</sup>H NMR (400 M, CDCl<sub>3</sub>): δ 2.81 (t, *J* = 7.6 Hz, 2H), 3.41 (t, *J* = 7.6 Hz, 2H), 7.62 (t, *J* = 7.6 Hz, 2H), 7.72 (t, *J* = 7.6 Hz, 1H), 7.93 (d, *J* = 7.6 Hz, 2H). <sup>13</sup>C NMR (100 M, CDCl<sub>3</sub>): δ 11.79, 50.75, 116.09, 128.04, 129.57, 134.51, 137.27. The spectroscopic data are in agreement with that previously reported.<sup>30</sup>

## Synthesis of 8.



**5-Phenethyldihydrofuran-2(3H)-one (8).** Ni(ClO<sub>4</sub>)<sub>2</sub>·6H<sub>2</sub>O (9.1 mg, 0.025 mmol), dppp (12.4 mg, 0.03 mmol), Zinc powder (32.7 mg, 0.5 mmol), Zn(CN)<sub>2</sub> (35.2 mg, 0.3 mmol), DMAP (61.1 mg, 0.5 mmol), acetonitrile (2.5 mL), 5-phenylpent-1-en-3-ol (81.1 mg, 0.5 mmol) and H<sub>2</sub>O (18 μL, 1 mmol) were stirred at 80 °C for 24 h. Column chromatography on silica gel (eluent: petroleum ether/ethyl acetate = 5:1) to give the product **8** in 67% yield (63.5 mg) as a colorless oil. <sup>1</sup>H NMR (400 M, CDCl<sub>3</sub>): δ 1.80-1.94 (m, 2H), 1.99-2.08 (m, 1H), 2.24-2.33 (m, 1H), 2.49-2.53 (m, 2H), 2.68-2.85 (m, 2H), 4.41-4.48 (m, 1H), 7.18-7.21 (m, 3H), 7.27-7.30 (m, 2H). <sup>13</sup>C NMR (100 M, CDCl<sub>3</sub>): δ 27.77, 28.63, 31.44, 37.13, 79.76, 125.99, 128.26, 128.35, 140.58, 177.03. The spectroscopic data are in agreement with that previously reported.<sup>31</sup>

#### Gram scale study:



To an oven-dried sealable Schlenk tube were added NiCl<sub>2</sub>·6H<sub>2</sub>O (0.5 mmol, 118.8 mg), Xantphos (0.6 mmol, 347.2 mg), Zn (2 mmol, 130.8 mg) and Zn(CN)<sub>2</sub> (6 mmol, 704.5 mg). The tube was evacuated and back-filled with argon for three times, then dioxane (50 mL), **1a** (10 mmol, 1.18 g) and water (1 mL) were added sequentially under argon. The tube was sealed and the mixture was stirred at 80 °C for 6 h, the mixture was filtered through a pad of silica gel and washed with ethyl acetate. The solvent was evaporated under the reduced pressure and dissolved in 20 mL ethyl acetate, then 3 mL 30% H<sub>2</sub>O<sub>2</sub> was added to the solution and the mixture was stirred at room temperature for 10 min. The reaction was quenched by saturated Na<sub>2</sub>S<sub>2</sub>O<sub>3</sub> and extracted with ethyl acetate, the organic layers was combined, washed by saturated NaCl and dried over anhydrous Na<sub>2</sub>SO<sub>4</sub>. The mixture was filtered and the solvent



was evaporated under the reduced pressure. The residue was purified by column chromatography on silica gel (eluent: petroleum ether/ethyl acetate = 30:1) to give the desired product **2a** in 86% yield (1.25 g) as a colorless oil.

## Control experiments.

### (1) Reaction of **1a** in the absence of water.



In a nitrogen-filled glove box,  $\text{NiCl}_2(\text{DME})$  (5.5 mg, 0.025 mmol), Xantphos (17.4 mg, 0.03 mmol), Zinc powder (6.5 mg, 0.1 mmol),  $\text{Zn}(\text{CN})_2$  (35.2 mg, 0.3 mmol), dioxane (2.5 mL) and 1-methyl-4-vinylbenzene (59.1 mg, 0.5 mmol) were added sequentially to a screw-cap vial. The vial cap was then securely fitted and taken outside the glove box. After the reaction mixture was stirred at 80 °C for 4 h, the mixture was filtered through a pad of silica gel and washed with ethyl acetate. The solvent was evaporated under the reduced pressure and the residue was dissolved in  $\text{CDCl}_3$ . The NMR yields were obtained by  $^1\text{H}$  NMR analysis of the crude mixture using mesitylene (60.1 mg, 0.5 mmol) as an internal standard. The desired product **2a** was not detected.

### (2) Deuterium labeling experiments.

#### a) $\text{NiCl}_2 \cdot 6\text{H}_2\text{O}$ -catalyzed deuterium labeling experiment of **1a** with $\text{D}_2\text{O}$ .



In a nitrogen-filled glove box,  $\text{NiCl}_2 \cdot 6\text{H}_2\text{O}$  (5.9 mg, 0.025 mmol), Xantphos (17.4 mg, 0.03 mmol), Zinc powder (6.5 mg, 0.1 mmol),  $\text{Zn}(\text{CN})_2$  (35.2 mg, 0.3 mmol), dioxane (2.5 mL) and 1-methyl-4-vinylbenzene (59.1 mg, 0.5 mmol) were added sequentially to a screw-cap vial. The vial cap was then securely fitted and taken outside the glove box, then  $\text{D}_2\text{O}$  (50  $\mu\text{L}$ ) was added to the vial. After the reaction mixture was stirred at 80 °C for 4 h, the mixture

was filtered through a pad of silica gel and washed with ethyl acetate. The solvent was evaporated under the reduced pressure and the residue was purified by column chromatography on silica gel (eluent: petroleum ether/ethyl acetate = 100:1) to give the desired product **2a-d** in 91% yield (66.8mg) as a colorless oil. <sup>1</sup>H NMR (400 M, CDCl<sub>3</sub>): δ 1.57-1.60 (m, 2.19H), 2.33 (s, 3H), 3.81-3.87 (m, 0.67H), 7.17 (d, *J* = 8.0 Hz, 2H), 7.22 (d, *J* = 8.0 Hz, 2H). <sup>13</sup>C NMR (100 M, CDCl<sub>3</sub>): δ 20.87, 21.06 (t, *J* = 19.4 Hz), 21.22, 21.31, 30.51, 30.59, 30.66, 121.65, 126.42, 129.61, 133.97, 137.64.

**b) NiCl<sub>2</sub>(DME)-catalyzed deuterium labeling experiment of 1a with D<sub>2</sub>O.**



In a nitrogen-filled glove box, NiCl<sub>2</sub>(DME) (5.5 mg, 0.025 mmol), Xantphos (17.4 mg, 0.03 mmol), Zinc powder (6.5 mg, 0.1 mmol), Zn(CN)<sub>2</sub> (35.2 mg, 0.3 mmol), dioxane (2.5 mL) and 1-methyl-4-vinylbenzene (59.1 mg, 0.5 mmol) were added sequentially to a screw-cap vial. The vial cap was then securely fitted and taken outside the glove box, then D<sub>2</sub>O (50 μL) was added to the vial. After the reaction mixture was stirred at 80 °C for 4 h, the mixture was filtered through a pad of silica gel and washed with ethyl acetate. The solvent was evaporated under the reduced pressure and the residue was purified by column chromatography on silica gel (eluent: petroleum ether/ethyl acetate = 100:1 to 50:1) to give the desired product **2a-d** in 89% yield (65.0 mg) as a colorless oil. <sup>1</sup>H NMR (400 M, CDCl<sub>3</sub>): δ 1.57-1.61 (m, 2.11H), 2.34 (s, 3H), 3.82-3.87 (m, 0.65H), 7.17 (d, *J* = 8.0 Hz, 2H), 7.23 (d, *J* = 8.0 Hz, 2H). <sup>13</sup>C NMR (100 M, CDCl<sub>3</sub>): δ 20.89, 21.06 (t, *J* = 20.1 Hz), 21.24, 21.34, 30.45, 30.54, 30.61, 30.69, 121.67, 126.43, 129.63, 133.99, 137.67. IR (neat): 3053, 3027, 2984, 2923, 2873, 2240, 1514, 1453, 1379, 1284, 1116, 1083, 1051, 1021, 814, 720 cm<sup>-1</sup>.

**c) NiCl<sub>2</sub>·6H<sub>2</sub>O-catalyzed deuterium labeling experiment of 2a with D<sub>2</sub>O.**



In a nitrogen-filled glove box,  $\text{NiCl}_2 \cdot 6\text{H}_2\text{O}$  (5.5 mg, 0.025 mmol), Xantphos (17.4 mg, 0.03 mmol), Zinc powder (6.5 mg, 0.1 mmol),  $\text{Zn}(\text{CN})_2$  (35.2 mg, 0.3 mmol), dioxane (2.5 mL) and **2a** (72.6 mg, 0.5 mmol) were added sequentially to a screw-cap vial. The vial cap was then securely fitted and taken outside the glove box, then  $\text{D}_2\text{O}$  (50  $\mu\text{L}$ ) was added to the vial. After the reaction mixture was stirred at 80 °C for 4 h, the mixture was filtered through a pad of silica gel and washed with ethyl acetate. The solvent was evaporated under the reduced pressure and the residue was purified by column chromatography on silica gel (eluent: petroleum ether/ethyl acetate = 100:1 to 50:1) to give product **2a** in 90% yield (65.3 mg) as a colorless oil.

### (3) $\text{Ni}(\text{cod})_2$ -catalyzed hydrocyanation of **1a**.



In a nitrogen-filled glove box,  $\text{Ni}(\text{cod})_2$  (6.9 mg, 0.025 mmol), Xantphos (17.4 mg, 0.03 mmol) and dioxane (2.5 mL) were stirred for at room temperature 10 min. Then  $\text{Zn}(\text{CN})_2$  (35.2 mg, 0.3 mmol) and 1-methyl-4-vinylbenzene (59.1 mg, 0.5 mmol) were added sequentially to the mixture. The vial cap was then securely fitted and taken outside the glove box, then  $\text{H}_2\text{O}$  (50  $\mu\text{L}$ ) was added to the vial. After the reaction mixture was stirred at 80 °C for 4 h, the mixture was filtered through a pad of silica gel and washed with ethyl acetate. The solvent was evaporated under the reduced pressure and the residue was purified by column chromatography on silica gel (eluent: petroleum ether/ethyl acetate = 100:1 to 50:1) to give the desired product **2a** in 90% yield (65.3 mg) as a colorless oil.

### (4) $\text{NiCl}(\text{dppf})^{32}$ -catalyzed hydrocyanation of **1a**.



In a nitrogen-filled glove box, NiCl(dppf) (9.7 mg, 0.015 mmol), Zn(CN)<sub>2</sub> (21.1 mg, 0.18 mmol), dioxane (1.5 mL), 1-methyl-4-vinylbenzene (35.5 mg, 0.3 mmol) were added sequentially to the vial. The vial cap was then securely fitted and taken outside the glove box, then H<sub>2</sub>O (30 μL) was added to the vial. After the reaction mixture was stirred at 80 °C for 8 h, the mixture was filtered through a pad of silica gel and washed with ethyl acetate. The solvent was evaporated under the reduced pressure and the residue was purified by column chromatography on silica gel (eluent: petroleum ether/ethyl acetate = 50:1) to give the desired product **2a** in 85% yield (37.0 mg) as a colorless oil.

It is unlikely that the reaction goes through Ni(I) species involving transmetalation of Ni-Cl with Zn(CN)<sub>2</sub> to form a Ni(I)-CN species followed by addition of Ni(I)-CN to the alkene and protonation (Scheme S1), since it is hard to explain the observed regioselectivity and deuterium labeling results. For regioselectivity, the formation of intermediate **18** would lead to the branched isomer. However, it is not stable compared to η<sup>3</sup>-benzyl nickel species. Deuterium labeling experiment indicated that deuterium was found in both benzylic position and methyl group. To explain the formation of the product bearing a D atom at the benzylic position, intermediate **21** should be formed (Scheme S2). However, **21** was not observed during the reaction. In addition, the intermediate **22** was also disfavored due to the steric effect.



**Scheme S1.** Unfavored reaction pathway for Ni(I)-catalyzed hydrocyanation reaction



**Scheme S2**

**(5) Reaction of 1a in the presence of TMSCN/MeOH.**



In a nitrogen-filled glove box, NiCl<sub>2</sub>·6H<sub>2</sub>O (5.9 mg, 0.025 mmol), Xantphos (17.4 mg, 0.03 mmol), Zinc powder (6.5 mg, 0.1 mmol), dioxane (2.5 mL), 1-methyl-4-vinylbenzene (59.1 mg, 0.5 mmol) and TMSCN (99.2 mg, 1 mmol) were added sequentially to a screw-cap

vial. The vial cap was then securely fitted and taken outside the glove box, then H<sub>2</sub>O (50 μL) and MeOH (32 mg, 1 mmol) were added to the vial. After the reaction mixture was stirred at 80 °C for 4 h, the mixture was filtered through a pad of silica gel and washed with ethyl acetate. The solvent was evaporated under the reduced pressure and the residue was dissolved in CDCl<sub>3</sub>. The NMR yields were obtained by <sup>1</sup>H NMR analysis of the crude mixture using mesitylene (60.1 mg, 0.5 mmol) as an internal standard. The desired product **2a** was not formed and 83% of starting material **1a** was observed. Column chromatography on silica gel (eluent: pentane) afforded the **1a** in 63% yield (37.0 mg) as a colorless liquid.

#### (6) Mercury poisoning experiment.



In a nitrogen-filled glove box, NiCl<sub>2</sub>·6H<sub>2</sub>O (5.9 mg, 0.025 mmol), Xantphos (17.4 mg, 0.03 mmol), Zinc powder (6.5 mg, 0.1 mmol), Zn(CN)<sub>2</sub> (35.2 mg, 0.3 mmol), dioxane (2.5 mL), 1-methyl-4-vinylbenzene (59.1 mg, 0.5 mmol) and Hg (501.5 mg, 2.5 mmol, 100 equiv respect to Ni) were added sequentially to a screw-cap vial. The vial cap was then securely fitted and taken outside the glove box, then H<sub>2</sub>O (50 μL) was added to the vial. After the reaction mixture was stirred at 80 °C for 4 h, the mixture was filtered through a pad of silica gel and washed with ethyl acetate. The solvent was evaporated under the reduced pressure and the residue was dissolved in CDCl<sub>3</sub>. The NMR yields were obtained by <sup>1</sup>H NMR analysis of the crude mixture using mesitylene (60.1 mg, 0.5 mmol) as an internal standard. 95% NMR yield of the desired product **2a** was observed.

#### (7) Ni-catalyzed hydrocyanation of **1a** using MeOH or PhCOOH as the hydrogen source.



In a nitrogen-filled glove box, NiCl<sub>2</sub>(DME) (5.5 mg, 0.025 mmol), Xantphos (17.4 mg, 0.03 mmol), Zinc powder (6.5 mg, 0.1 mmol), Zn(CN)<sub>2</sub> (35.2 mg, 0.3 mmol), dioxane (2.5 mL) and 1-methyl-4-vinylbenzene (59.1 mg, 0.5 mmol) were added sequentially to a screw-cap vial. The vial cap was then securely fitted and taken outside the glove box, then MeOH (32 mg, 1.0 mmol) was added to the vial. After the reaction mixture was stirred at 80 °C for 4 h, the mixture was filtered through a pad of silica gel and washed with ethyl acetate. The solvent was evaporated under the reduced pressure and the residue was dissolved in CDCl<sub>3</sub>. The NMR yields were obtained by <sup>1</sup>H NMR analysis of the crude mixture using mesitylene (60.1 mg, 0.5 mmol) as an internal standard. 11% NMR yield of the desired product **2a** was observed.



In a nitrogen-filled glove box, NiCl<sub>2</sub>(DME) (5.5 mg, 0.025 mmol), Xantphos (17.4 mg, 0.03 mmol), Zinc powder (6.5 mg, 0.1 mmol), Zn(CN)<sub>2</sub> (35.2 mg, 0.3 mmol), PhCOOH (122.1 mg, 1.0 mmol), dioxane (2.5 mL) and 1-methyl-4-vinylbenzene (59.1 mg, 0.5 mmol) were added sequentially to a screw-cap vial. The vial cap was then securely fitted and taken outside the glove box. After the reaction mixture was stirred at 80 °C for 4 h, the mixture was filtered through a pad of silica gel and washed with ethyl acetate. The solvent was evaporated under the reduced pressure and the residue was dissolved in CDCl<sub>3</sub>. The NMR yields were obtained by <sup>1</sup>H NMR analysis of the crude mixture using mesitylene (60.1 mg, 0.5 mmol) as an internal standard. 6% NMR yield of the desired product **2a** was observed.

## References

- (1) R. Shang, D.-S. Ji, L. Chu, Y. Fu and L. Liu, *Angew. Chem., Int. Ed.*, 2011, **50**, 4470.
- (2) Y. Huang, Y. Yu, Z. Zhu, C. Zhu, J. Cen, X. Li, W. Wu and H. Jiang, *J. Org. Chem.*, 2017, **82**, 7621.
- (3) T. Moriya, K. Shoji, S. Yoneda, R. Ikeda, T. Konakahara and N. Sakai, *Synthesis*, 2013, **45**, 3233.
- (4) F. Song, R. Salter and L. Chen, *J. Org. Chem.*, 2017, **82**, 3530.
- (5) M. de Greef and B. Breit, *Angew. Chem., Int. Ed.*, 2009, **48**, 551.
- (6) S. Ueno, R. Maeda, S. Yasuoka and R. Kuwano, *Chem. Lett.*, 2013, **42**, 40.
- (7) L. Wu and J. F. Hartwig, *J. Am. Chem. Soc.*, 2005, **127**, 15824.
- (8) G. Rajagopal and S. S. Kim, *Tetrahedron*, 2009, **65**, 4351.
- (9) Y. Chen, J. P. Romaine and T. R. Newhouse, *J. Am. Chem. Soc.*, 2015, **137**, 5875.
- (10) B. Anxionnat, D. G. Pardo, G. Ricci and J. Cossy, *Org. Lett.*, 2011, **13**, 4084.
- (11) D. Srimani, G. Leitus, Y. Ben-David and D. Milstein, *Angew. Chem., Int. Ed.*, 2014, **53**, 11092.
- (12) D.-J. Dong, Y. Li, J.-Q. Wang and S.-K. Tian, *Chem. Commun.*, 2011, **47**, 2158.
- (13) D. W. Kim and D. Y. Chi, *Angew. Chem., Int. Ed.*, 2004, **43**, 483.
- (14) N. Früh and A. Togni, *Angew. Chem., Int. Ed.*, 2014, **53**, 10813.
- (15) F. Lima, U. K. Sharma, L. Grunenberg, D. Saha, S. Johannsen, J. Sedelmeier, E. V. Van der Eycken and S. V. Ley, *Angew. Chem., Int. Ed.*, 2017, **56**, 15136.
- (16) J.-C. Hsieh, Y.-H. Chu, K. Muralirajan and C.-H. Cheng, *Chem. Commun.*, 2017, **53**, 11584.
- (17) J.-J. Dai, W.-M. Zhang, Y.-J. Shu, Y.-Y. Sun, J. Xu, Y.-S. Feng and H.-J. Xu, *Chem. Commun.*, 2016, **52**, 6793.
- (18) T. Kochi, S. Noda, K. Yoshimura and K. Nozaki, *J. Am. Chem. Soc.*, 2007, **129**, 8948.
- (19) Y. Yoshimi, S. Washida, Y. Okita, K. Nishikawa, K. Maeda, S. Hayashi and T. Morita, *Tetrahedron Lett.*, 2013, **54**, 4324.
- (20) T. Zou, X. Yu, X. Feng and M. Bao, *Chem. Commun.*, 2015, **51**, 10714.
- (21) D. Saylik, E. M. Campi, A. C. Donohue, W. R. Jackson and A. J. Robinson, *Tetrahedron: Asymmetry*, 2001, **12**, 657.



- (22) T. Ikawa, Y. Fujita, T. Mizusaki, S. Betsuin, H. Takamatsu, T. Maegawa, Y. Monguchi and H. Sajiki, *Org. Biomol. Chem.*, 2012, **10**, 293.
- (23) J. A. Souto, R. A. Stockman and S. V. Ley, *Org. Biomol. Chem.*, 2015, **13**, 3871.
- (24) F. F. Fleming, L. A. Funk, R. Altundas and V. Sharief, *J. Org. Chem.*, 2002, **67**, 9414.
- (25) T. Wang and N. Jiao, *J. Am. Chem. Soc.*, 2013, **135**, 11692.
- (26) C. Bruno, A. Catalano, J.-F. Desaphy, M. M. Cavalluzzi, A. Carocci, A. Dipalma, C. Franchini, G. Lentini, D. C. Camerino and V. Tortorella, *Heterocycles*, 2007, **71**, 2011.
- (27) P. Setzer, G. Forcher, F. Boeda, M. S. M. Pearson-Long and P. Bertus, *Eur. - J. Org. Chem.*, 2014, **2014**, 171.
- (28) R. Zhou, Y. Y. Goh, H. Liu, H. Tao, L. Li and J. Wu, *Angew. Chem., Int. Ed.*, 2017, **56**, 16621.
- (29) I. Ojima and M. Kumagai, *J. Organomet. Chem.*, 1976, **111**, 43.
- (30) J. Y. Lee, Y.-T. Hong and S. Kim, *Angew. Chem., Int. Ed.*, 2006, **45**, 6182.
- (31) C. Shu, M.-Q. Liu, Y.-Z. Sun and L.-W. Ye, *Org. Lett.*, 2012, **14**, 4958.
- (32) X. Zhang, A. Xia, H. Chen and Y. Liu, *Org. Lett.*, 2017, **19**, 2118.

























7.201  
7.184  
7.178  
7.152

2.994  
2.975  
2.956  
2.601  
2.582  
2.563  
2.332

0.000





























































7.562  
7.344  
7.325  
7.281  
7.278  
7.262  
7.246  
7.229

3.198  
3.181  
3.163  
3.146  
3.128  
3.111  
2.636  
2.620  
2.594  
2.578  
2.570  
2.551  
2.528  
2.510  
1.456  
1.439

0.000































**2v** d.r.=1:1





220.512

139.467  
 137.260  
 134.311  
 134.294  
 127.033  
 125.844  
 123.853  
 121.567

77.318  
 77.000  
 76.678

50.205  
 47.705  
 44.017  
 37.779  
 35.618  
 31.327  
 30.523  
 30.502  
 29.145  
 29.124  
 26.133  
 25.461  
 21.352  
 21.228  
 21.199  
 13.617







135.595  
132.409  
128.626  
128.173  
126.453  
124.233  
120.809

77.319  
77.000  
76.681

28.273

18.946





**4a'** (*E/Z* = 33.3:1)





4a' (E/Z = 33.3:1)

135.328  
133.673  
132.576  
131.115  
128.005  
127.787  
127.581  
126.105  
126.052  
125.366  
125.160  
123.446

77.319  
77.000  
76.681

18.600









5







137.032  
133.384  
132.073  
128.252  
127.531  
127.349  
126.723  
126.694  
126.092  
125.449  
119.468

77.317  
77.000  
76.683

34.314

26.601

16.221



























6e





















7.336  
7.318  
7.299  
7.260  
7.237  
7.219  
7.211  
7.209  
7.191

3.903  
3.888  
3.875  
3.871  
3.861  
3.846

2.684  
2.663  
2.642  
2.448  
2.430  
2.411  
1.940  
1.930  
1.921  
1.910  
1.906  
1.895  
1.887  
1.876  
1.872  
1.868  
1.855  
1.845  
1.842  
1.836  
1.830  
1.823  
1.814  
1.809  
1.802  
1.789  
1.774  
0.948  
0.118  
0.113

































6m

















6p











136.460  
 133.758  
 133.341  
 130.041  
 129.414  
 128.015  
 127.953  
 121.018

77.318  
 77.000  
 76.678

11.946  
 11.859  
 11.768  
 11.430  
 -3.669  
 -5.092  
 -5.686















137.644  
133.970  
129.605  
126.417  
121.650

77.319  
77.000  
76.681

30.657  
30.589  
30.513  
21.313  
21.237  
21.222  
21.040  
20.865
